# Supplementary material for: Leptin concentration and risk of coronary heart disease and stroke: A systematic review and meta-analysis
Source: PLoS One. 2017 Mar 9;12(3):e0166360. doi: 10.1371/journal.pone.0166360 (PMC5344319; doi:10.1371/journal.pone.0166360)
Supplement: S1 Data — (RM5) [file pone.0166360.s002.rm5]

<?xml version="1.0" encoding="ISO-8859-1" standalone="no"?>
<COCHRANE_REVIEW DESCRIPTION="" DOI="" GROUP_ID="" ID="279116020219333325" MERGED_FROM="" MODIFIED="2017-02-17 09:35:07 +0800" MODIFIED_BY="[Empty name]" REVIEW_NO="" REVMAN_SUB_VERSION="5.3.5 " REVMAN_VERSION="5" SPLIT_FROM="" STAGE="P" STATUS="A" SUBTYPE="Prognosis" TAGS="" TYPE="FLEXIBLE" VERSION_NO="0.0">
<COVER_SHEET>
<TITLE>New Flexible review</TITLE>
<CONTACT>
<PERSON ID="????" ROLE="UNKNOWN">
<PREFIX/>
<FIRST_NAME/>
<MIDDLE_INITIALS/>
<LAST_NAME/>
<SUFFIX/>
<POSITION/>
<EMAIL_1/>
<EMAIL_2/>
<URL/>
<MOBILE_PHONE/>
<ADDRESS>
<DEPARTMENT/>
<ORGANISATION/>
<ADDRESS_1/>
<ADDRESS_2/>
<CITY/>
<ZIP/>
<REGION/>
<COUNTRY CODE="NONE">Other</COUNTRY>
<PHONE_1/>
<PHONE_2/>
<FAX_1/>
<FAX_2/>
</ADDRESS>
<FOOTNOTE/>
</PERSON>
</CONTACT>
<CREATORS>
<PERSON ID="????" ROLE="AUTHOR">
<PREFIX/>
<FIRST_NAME/>
<MIDDLE_INITIALS/>
<LAST_NAME/>
<SUFFIX/>
<POSITION/>
<EMAIL_1/>
<EMAIL_2/>
<URL/>
<MOBILE_PHONE/>
<ADDRESS>
<DEPARTMENT/>
<ORGANISATION/>
<ADDRESS_1/>
<ADDRESS_2/>
<CITY/>
<ZIP/>
<REGION/>
<COUNTRY CODE="NONE">Other</COUNTRY>
<PHONE_1/>
<PHONE_2/>
<FAX_1/>
<FAX_2/>
</ADDRESS>
<FOOTNOTE/>
</PERSON>
</CREATORS>
<DATES>
<UP_TO_DATE>
<DATE DAY="" MONTH="" YEAR=""/>
</UP_TO_DATE>
<LAST_SEARCH>
<DATE DAY="" MONTH="" YEAR=""/>
</LAST_SEARCH>
<NEXT_STAGE>
<DATE DAY="" MONTH="" YEAR=""/>
</NEXT_STAGE>
<PROTOCOL_PUBLISHED ISSUE="" YEAR=""/>
<REVIEW_PUBLISHED ISSUE="" YEAR=""/>
<LAST_CITATION_ISSUE ISSUE="" YEAR=""/>
</DATES>
<WHATS_NEW/>
<HISTORY/>
<SOURCES_OF_SUPPORT>
<INTERNAL_SOURCES/>
<EXTERNAL_SOURCES/>
</SOURCES_OF_SUPPORT>
<MESH_TERMS VERIFIED="NO"/>
<KEYWORDS/>
</COVER_SHEET>
<MAIN_TEXT>
<SUMMARY>
<TITLE>[Summary title]</TITLE>
<SUMMARY_BODY>
<P>[Summary text]</P>
</SUMMARY_BODY>
</SUMMARY>
<ABSTRACT>
<ABS_BACKGROUND/>
<ABS_OBJECTIVES/>
<ABS_SEARCH_STRATEGY/>
<ABS_SELECTION_CRITERIA/>
<ABS_DATA_COLLECTION/>
<ABS_RESULTS/>
<ABS_CONCLUSIONS/>
</ABSTRACT>
<BODY>
<BACKGROUND>
<P/>
</BACKGROUND>
<OBJECTIVES>
<P/>
</OBJECTIVES>
<METHODS>
<P/>
<SUBSECTION>
<HEADING FIXED="YES" LEVEL="2">Criteria for considering studies for this review</HEADING>
<P/>
</SUBSECTION>
<SUBSECTION>
<HEADING FIXED="YES" LEVEL="2">Search methods for identification of studies</HEADING>
<P/>
</SUBSECTION>
<SUBSECTION>
<HEADING FIXED="YES" LEVEL="2">Data collection and analysis</HEADING>
<P/>
</SUBSECTION>
</METHODS>
<RESULTS>
<P/>
</RESULTS>
<DISCUSSION>
<P/>
</DISCUSSION>
<CONCLUSIONS>
<P/>
<SUBSECTION FORMATTING_OPTIONS="SECTION_TEXT">
<HEADING FIXED="YES" LEVEL="2">Implications for practice</HEADING>
<P/>
</SUBSECTION>
<SUBSECTION FORMATTING_OPTIONS="SECTION_TEXT">
<HEADING FIXED="YES" LEVEL="2">Implications for research</HEADING>
<P/>
</SUBSECTION>
</CONCLUSIONS>
</BODY>
<ACKNOWLEDGEMENTS/>
<CONFLICT_OF_INTEREST/>
<CONTRIBUTIONS/>
<PRO_REV_DIFF/>
<PUBLIC_NOTES/>
</MAIN_TEXT>
<STUDIES_AND_REFERENCES MODIFIED="2016-02-02 19:50:38 +0800" MODIFIED_BY="[Empty name]">
<STUDIES MODIFIED="2016-02-02 19:50:38 +0800" MODIFIED_BY="[Empty name]">
<INCLUDED_STUDIES MODIFIED="2016-02-02 19:50:38 +0800" MODIFIED_BY="[Empty name]">
<STUDY DATA_SOURCE="PUB" ID="STD-A.-Michael-Wallace_x002c_2001" MODIFIED="2016-02-02 19:35:15 +0800" MODIFIED_BY="[Empty name]" NAME="A. Michael Wallace,2001" YEAR="2001">
<REFERENCE PRIMARY="NO" TYPE="JOURNAL_ARTICLE">
<IDENTIFIERS/>
</REFERENCE>
<IDENTIFIERS/>
</STUDY>
<STUDY DATA_SOURCE="PUB" ID="STD-Charles_x002c_1998" MODIFIED="2016-02-02 19:43:48 +0800" MODIFIED_BY="[Empty name]" NAME="Charles,1998" YEAR="1998">
<REFERENCE PRIMARY="NO" TYPE="JOURNAL_ARTICLE">
<IDENTIFIERS/>
</REFERENCE>
<IDENTIFIERS/>
</STUDY>
<STUDY DATA_SOURCE="PUB" ID="STD-Christof-Prugger_x002c_2012" MODIFIED="2016-02-02 19:45:44 +0800" MODIFIED_BY="[Empty name]" NAME="Christof Prugger,2012" YEAR="2012">
<REFERENCE PRIMARY="NO" TYPE="JOURNAL_ARTICLE">
<IDENTIFIERS/>
</REFERENCE>
<IDENTIFIERS/>
</STUDY>
<STUDY DATA_SOURCE="PUB" ID="STD-Debbie-A.-Lawlor_x002c_2007" MODIFIED="2016-02-02 19:44:19 +0800" MODIFIED_BY="[Empty name]" NAME="Debbie A. Lawlor,2007" YEAR="2007">
<REFERENCE PRIMARY="NO" TYPE="JOURNAL_ARTICLE">
<IDENTIFIERS/>
</REFERENCE>
<IDENTIFIERS/>
</STUDY>
<STUDY DATA_SOURCE="PUB" ID="STD-Ekim-Seven_x002c_2015" MODIFIED="2016-02-02 19:50:38 +0800" MODIFIED_BY="[Empty name]" NAME="Ekim Seven,2015" YEAR="2015">
<REFERENCE PRIMARY="NO" TYPE="JOURNAL_ARTICLE">
<IDENTIFIERS/>
</REFERENCE>
<IDENTIFIERS/>
</STUDY>
<STUDY DATA_SOURCE="PUB" ID="STD-Hamidreza-Saber_x002c_2015" MODIFIED="2016-02-02 19:46:09 +0800" MODIFIED_BY="[Empty name]" NAME="Hamidreza Saber,2015" YEAR="2015">
<REFERENCE PRIMARY="NO" TYPE="JOURNAL_ARTICLE">
<IDENTIFIERS/>
</REFERENCE>
<IDENTIFIERS/>
</STUDY>
<STUDY DATA_SOURCE="PUB" ID="STD-Jiankang-Liu_x002c_2010_x002c_F" MODIFIED="2016-02-02 19:35:40 +0800" MODIFIED_BY="[Empty name]" NAME="Jiankang Liu,2010,F" YEAR="">
<REFERENCE PRIMARY="NO" TYPE="JOURNAL_ARTICLE">
<IDENTIFIERS/>
</REFERENCE>
<IDENTIFIERS/>
</STUDY>
<STUDY DATA_SOURCE="PUB" ID="STD-Jiankang-Liu_x002c_2010_x002c_M" MODIFIED="2016-02-02 19:36:07 +0800" MODIFIED_BY="[Empty name]" NAME="Jiankang Liu,2010,M" YEAR="">
<REFERENCE PRIMARY="NO" TYPE="JOURNAL_ARTICLE">
<IDENTIFIERS/>
</REFERENCE>
<IDENTIFIERS/>
</STUDY>
<STUDY DATA_SOURCE="PUB" ID="STD-Jose_x002c_2005" MODIFIED="2016-02-02 19:49:52 +0800" MODIFIED_BY="[Empty name]" NAME="Jose,2005" YEAR="2005">
<REFERENCE PRIMARY="NO" TYPE="JOURNAL_ARTICLE">
<IDENTIFIERS/>
</REFERENCE>
<IDENTIFIERS/>
</STUDY>
<STUDY DATA_SOURCE="PUB" ID="STD-Justo-Sierra_x002d_Johnson_x002c_2007_x002c_F" MODIFIED="2016-02-02 19:48:15 +0800" MODIFIED_BY="[Empty name]" NAME="Justo Sierra-Johnson,2007,F" YEAR="">
<REFERENCE PRIMARY="NO" TYPE="JOURNAL_ARTICLE">
<IDENTIFIERS/>
</REFERENCE>
<IDENTIFIERS/>
</STUDY>
<STUDY DATA_SOURCE="PUB" ID="STD-Justo-Sierra_x002d_Johnson_x002c_2007_x002c_M" MODIFIED="2016-02-02 19:48:38 +0800" MODIFIED_BY="[Empty name]" NAME="Justo Sierra-Johnson,2007,M" YEAR="">
<REFERENCE PRIMARY="NO" TYPE="JOURNAL_ARTICLE">
<IDENTIFIERS/>
</REFERENCE>
<IDENTIFIERS/>
</STUDY>
<STUDY DATA_SOURCE="PUB" ID="STD-Naveed-Sattar_x002c_2009" MODIFIED="2016-02-02 19:45:14 +0800" MODIFIED_BY="[Empty name]" NAME="Naveed Sattar,2009" YEAR="2009">
<REFERENCE PRIMARY="NO" TYPE="JOURNAL_ARTICLE">
<IDENTIFIERS/>
</REFERENCE>
<IDENTIFIERS/>
</STUDY>
<STUDY DATA_SOURCE="PUB" ID="STD-S.-S_x00f6_derberg_x002c_1999" MODIFIED="2016-02-02 19:47:50 +0800" MODIFIED_BY="[Empty name]" NAME="S. S�derberg,1999" YEAR="1999">
<REFERENCE PRIMARY="NO" TYPE="JOURNAL_ARTICLE">
<IDENTIFIERS/>
</REFERENCE>
<IDENTIFIERS/>
</STUDY>
<STUDY DATA_SOURCE="PUB" ID="STD-S.-S_x00f6_derberg_x002c_2004_x002c_F" MODIFIED="2016-02-02 19:46:43 +0800" MODIFIED_BY="[Empty name]" NAME="S. S�derberg,2004,F" YEAR="">
<REFERENCE PRIMARY="NO" TYPE="JOURNAL_ARTICLE">
<IDENTIFIERS/>
</REFERENCE>
<IDENTIFIERS/>
</STUDY>
<STUDY DATA_SOURCE="PUB" ID="STD-S.-S_x00f6_derberg_x002c_2004_x002c_M" MODIFIED="2016-02-02 19:47:11 +0800" MODIFIED_BY="[Empty name]" NAME="S. S�derberg,2004,M" YEAR="">
<REFERENCE PRIMARY="NO" TYPE="JOURNAL_ARTICLE">
<IDENTIFIERS/>
</REFERENCE>
<IDENTIFIERS/>
</STUDY>
<STUDY DATA_SOURCE="PUB" ID="STD-Seth-S.-Martin_x002c_2015_x002c_F" MODIFIED="2016-02-02 19:34:17 +0800" MODIFIED_BY="[Empty name]" NAME="Seth S. Martin,2015,F" YEAR="">
<REFERENCE PRIMARY="NO" TYPE="JOURNAL_ARTICLE">
<IDENTIFIERS/>
</REFERENCE>
<IDENTIFIERS/>
</STUDY>
<STUDY DATA_SOURCE="PUB" ID="STD-Seth-S.-Martin_x002c_2015_x002c_M" MODIFIED="2016-02-02 19:34:39 +0800" MODIFIED_BY="[Empty name]" NAME="Seth S. Martin,2015,M" YEAR="">
<REFERENCE PRIMARY="NO" TYPE="JOURNAL_ARTICLE">
<IDENTIFIERS/>
</REFERENCE>
<IDENTIFIERS/>
</STUDY>
<STUDY DATA_SOURCE="PUB" ID="STD-Swapnil-N.Rajpathak_x002c_2011" MODIFIED="2016-02-02 19:37:45 +0800" MODIFIED_BY="[Empty name]" NAME="Swapnil N.Rajpathak,2011" YEAR="2011">
<REFERENCE PRIMARY="NO" TYPE="JOURNAL_ARTICLE">
<IDENTIFIERS/>
</REFERENCE>
<IDENTIFIERS/>
</STUDY>
</INCLUDED_STUDIES>
<EXCLUDED_STUDIES/>
<AWAITING_STUDIES/>
<ONGOING_STUDIES/>
</STUDIES>
<OTHER_REFERENCES>
<ADDITIONAL_REFERENCES/>
<OTHER_VERSIONS_REFERENCES/>
<PENDING_REFERENCES/>
</OTHER_REFERENCES>
</STUDIES_AND_REFERENCES>
<CHARACTERISTICS_OF_STUDIES MODIFIED="2016-02-02 19:50:38 +0800" MODIFIED_BY="[Empty name]">
<CHARACTERISTICS_OF_INCLUDED_STUDIES MODIFIED="2016-02-02 19:50:38 +0800" MODIFIED_BY="[Empty name]" SORT_BY="STUDY" USER_DEF_1_ENABLED="NO" USER_DEF_2_ENABLED="NO" USER_DEF_3_ENABLED="NO" USER_DEF_4_ENABLED="NO" USER_DEF_5_ENABLED="NO" USER_DEF_6_ENABLED="NO" USER_DEF_7_ENABLED="NO" USER_DEF_8_ENABLED="NO">
<INCLUDED_CHAR STUDY_ID="STD-A.-Michael-Wallace_x002c_2001">
<CHAR_NOTES/>
</INCLUDED_CHAR>
<INCLUDED_CHAR STUDY_ID="STD-Charles_x002c_1998">
<CHAR_NOTES/>
</INCLUDED_CHAR>
<INCLUDED_CHAR STUDY_ID="STD-Christof-Prugger_x002c_2012">
<CHAR_NOTES/>
</INCLUDED_CHAR>
<INCLUDED_CHAR STUDY_ID="STD-Debbie-A.-Lawlor_x002c_2007">
<CHAR_NOTES/>
</INCLUDED_CHAR>
<INCLUDED_CHAR STUDY_ID="STD-Ekim-Seven_x002c_2015">
<CHAR_NOTES/>
</INCLUDED_CHAR>
<INCLUDED_CHAR STUDY_ID="STD-Hamidreza-Saber_x002c_2015">
<CHAR_NOTES/>
</INCLUDED_CHAR>
<INCLUDED_CHAR STUDY_ID="STD-Jiankang-Liu_x002c_2010_x002c_F">
<CHAR_NOTES/>
</INCLUDED_CHAR>
<INCLUDED_CHAR STUDY_ID="STD-Jiankang-Liu_x002c_2010_x002c_M">
<CHAR_NOTES/>
</INCLUDED_CHAR>
<INCLUDED_CHAR STUDY_ID="STD-Jose_x002c_2005">
<CHAR_NOTES/>
</INCLUDED_CHAR>
<INCLUDED_CHAR STUDY_ID="STD-Justo-Sierra_x002d_Johnson_x002c_2007_x002c_F">
<CHAR_NOTES/>
</INCLUDED_CHAR>
<INCLUDED_CHAR STUDY_ID="STD-Justo-Sierra_x002d_Johnson_x002c_2007_x002c_M">
<CHAR_NOTES/>
</INCLUDED_CHAR>
<INCLUDED_CHAR STUDY_ID="STD-Naveed-Sattar_x002c_2009">
<CHAR_NOTES/>
</INCLUDED_CHAR>
<INCLUDED_CHAR STUDY_ID="STD-S.-S_x00f6_derberg_x002c_1999">
<CHAR_NOTES/>
</INCLUDED_CHAR>
<INCLUDED_CHAR STUDY_ID="STD-S.-S_x00f6_derberg_x002c_2004_x002c_F">
<CHAR_NOTES/>
</INCLUDED_CHAR>
<INCLUDED_CHAR STUDY_ID="STD-S.-S_x00f6_derberg_x002c_2004_x002c_M">
<CHAR_NOTES/>
</INCLUDED_CHAR>
<INCLUDED_CHAR STUDY_ID="STD-Seth-S.-Martin_x002c_2015_x002c_F">
<CHAR_NOTES/>
</INCLUDED_CHAR>
<INCLUDED_CHAR STUDY_ID="STD-Seth-S.-Martin_x002c_2015_x002c_M">
<CHAR_NOTES/>
</INCLUDED_CHAR>
<INCLUDED_CHAR STUDY_ID="STD-Swapnil-N.Rajpathak_x002c_2011">
<CHAR_NOTES/>
</INCLUDED_CHAR>
<FOOTNOTES/>
</CHARACTERISTICS_OF_INCLUDED_STUDIES>
<CHARACTERISTICS_OF_EXCLUDED_STUDIES SORT_BY="STUDY">
<FOOTNOTES/>
</CHARACTERISTICS_OF_EXCLUDED_STUDIES>
<CHARACTERISTICS_OF_AWAITING_STUDIES SORT_BY="STUDY" USER_DEF_1_ENABLED="NO" USER_DEF_2_ENABLED="NO" USER_DEF_3_ENABLED="NO" USER_DEF_4_ENABLED="NO" USER_DEF_5_ENABLED="NO" USER_DEF_6_ENABLED="NO" USER_DEF_7_ENABLED="NO" USER_DEF_8_ENABLED="NO">
<FOOTNOTES/>
</CHARACTERISTICS_OF_AWAITING_STUDIES>
<CHARACTERISTICS_OF_ONGOING_STUDIES SORT_BY="STUDY" USER_DEF_1_ENABLED="NO" USER_DEF_2_ENABLED="NO" USER_DEF_3_ENABLED="NO" USER_DEF_4_ENABLED="NO" USER_DEF_5_ENABLED="NO" USER_DEF_6_ENABLED="NO" USER_DEF_7_ENABLED="NO" USER_DEF_8_ENABLED="NO">
<FOOTNOTES/>
</CHARACTERISTICS_OF_ONGOING_STUDIES>
</CHARACTERISTICS_OF_STUDIES>
<QUALITY_ITEMS MODIFIED="2016-02-02 19:50:38 +0800" MODIFIED_BY="[Empty name]"/>
<SOF_TABLES/>
<ADDITIONAL_TABLES/>
<ANALYSES_AND_DATA CALCULATED_DATA="YES" MODIFIED="2017-02-17 09:35:07 +0800" MODIFIED_BY="[Empty name]">
<COMPARISON ID="CMP-002" MODIFIED="2017-02-17 09:29:14 +0800" MODIFIED_BY="[Empty name]" NO="2">
<NAME>sociodemographics-adjusted</NAME>
<IV_OUTCOME CHI2="16.608675142796784" CI_END="1.3226451558011727" CI_START="1.0150819672398383" CI_STUDY="95" CI_TOTAL="95" DF="9" EFFECT_SIZE="1.1587032608527936" ESTIMABLE="YES" I2="45.81145140945623" I2_Q="0.0" ID="CMP-002.01" LOG_CI_END="0.12144334566306941" LOG_CI_START="0.006501112675502617" LOG_DATA="YES" LOG_EFFECT_SIZE="0.06397222916928606" MODIFIED="2017-02-17 08:54:37 +0800" MODIFIED_BY="[Empty name]" NO="1" P_CHI2="0.055208614327677985" P_Q="1.0" P_Z="0.029133569543496492" Q="0.0" RANDOM="YES" SCALE="12.121724548719161" SHOW_PARTICIPANTS="NO" SORT_BY="STUDY" STUDIES="10" SUBGROUPS="NO" SUBGROUP_TEST="YES" TAU2="0.015775854854981734" TOTALS="YES" TOTAL_1="0" TOTAL_2="0" WEIGHT="99.99999999999999" Z="2.181674427642377">
<NAME>S1. Fig CHD</NAME>
<GROUP_LABEL_1>Experimental</GROUP_LABEL_1>
<GROUP_LABEL_2>Control</GROUP_LABEL_2>
<GRAPH_LABEL_1>Favours [experimental]</GRAPH_LABEL_1>
<GRAPH_LABEL_2>Favours [control]</GRAPH_LABEL_2>
<EFFECT_MEASURE>Odds Ratio</EFFECT_MEASURE>
<IV_DATA CI_END="1.435493739615715" CI_START="1.0198862898556709" EFFECT_SIZE="1.2099753651243128" ESTIMABLE="YES" ESTIMATE="0.1906" LOG_CI_END="0.15700130281909522" LOG_CI_START="0.008551753682424309" LOG_EFFECT_SIZE="0.08277652825075976" MODIFIED="2016-02-02 20:50:32 +0800" MODIFIED_BY="[Empty name]" ORDER="35" SE="0.0872" STUDY_ID="STD-A.-Michael-Wallace_x002c_2001" TOTAL_1="0" TOTAL_2="0" WEIGHT="19.498249589628085"/>
<IV_DATA CI_END="1.2818455202959853" CI_START="0.9100089428163624" EFFECT_SIZE="1.0800420763926004" ESTIMABLE="YES" ESTIMATE="0.077" LOG_CI_END="0.10783568998352884" LOG_CI_START="-0.04095433977042803" LOG_EFFECT_SIZE="0.03344067510655043" MODIFIED="2016-02-02 20:50:54 +0800" MODIFIED_BY="[Empty name]" ORDER="36" SE="0.0874" STUDY_ID="STD-Debbie-A.-Lawlor_x002c_2007" TOTAL_1="0" TOTAL_2="0" WEIGHT="19.469170363687926"/>
<IV_DATA CI_END="1.326194885553986" CI_START="1.0498907871497103" EFFECT_SIZE="1.17998296271946" ESTIMABLE="YES" ESTIMATE="0.1655" LOG_CI_END="0.12260734873059356" LOG_CI_START="0.02114412477938281" LOG_EFFECT_SIZE="0.07187573675498822" MODIFIED="2016-02-02 20:51:11 +0800" MODIFIED_BY="[Empty name]" ORDER="37" SE="0.0596" STUDY_ID="STD-Ekim-Seven_x002c_2015" TOTAL_1="0" TOTAL_2="0" WEIGHT="23.585615441219524"/>
<IV_DATA CI_END="1.431705373137363" CI_START="0.7700758193033221" EFFECT_SIZE="1.050010327672887" ESTIMABLE="YES" ESTIMATE="0.0488" LOG_CI_END="0.1558536548534689" LOG_CI_START="-0.11346651341971153" LOG_EFFECT_SIZE="0.02119357071687869" MODIFIED="2016-07-30 18:37:18 +0800" MODIFIED_BY="[Empty name]" ORDER="89" SE="0.1582" STUDY_ID="STD-Jiankang-Liu_x002c_2010_x002c_F" TOTAL_1="0" TOTAL_2="0" WEIGHT="11.172268359347752"/>
<IV_DATA CI_END="2.612815602535465" CI_START="0.3099859160000634" EFFECT_SIZE="0.8999644647935904" ESTIMABLE="YES" ESTIMATE="-0.1054" LOG_CI_END="0.4171087608076359" LOG_CI_START="-0.5086580375928413" LOG_EFFECT_SIZE="-0.045774638392602755" MODIFIED="2016-07-30 18:33:10 +0800" MODIFIED_BY="[Empty name]" ORDER="90" SE="0.5438" STUDY_ID="STD-Jiankang-Liu_x002c_2010_x002c_M" TOTAL_1="0" TOTAL_2="0" WEIGHT="1.463471829633373"/>
<IV_DATA CI_END="12.156784248944138" CI_START="1.2898328181578282" EFFECT_SIZE="3.9598256637827265" ESTIMABLE="YES" ESTIMATE="1.3762" LOG_CI_END="1.0848187091771173" LOG_CI_START="0.11053342281339312" LOG_EFFECT_SIZE="0.5976760659952552" MODIFIED="2016-02-02 20:52:39 +0800" MODIFIED_BY="[Empty name]" ORDER="40" SE="0.5723" STUDY_ID="STD-Justo-Sierra_x002d_Johnson_x002c_2007_x002c_F" TOTAL_1="0" TOTAL_2="0" WEIGHT="1.327873433272344"/>
<IV_DATA CI_END="7.133264895165102" CI_START="1.399942215073756" EFFECT_SIZE="3.1600883940240174" ESTIMABLE="YES" ESTIMATE="1.1506" LOG_CI_END="0.8532883519293327" LOG_CI_START="0.1461101098264305" LOG_EFFECT_SIZE="0.4996992308778816" MODIFIED="2016-02-02 20:52:18 +0800" MODIFIED_BY="[Empty name]" ORDER="41" SE="0.4154" STUDY_ID="STD-Justo-Sierra_x002d_Johnson_x002c_2007_x002c_M" TOTAL_1="0" TOTAL_2="0" WEIGHT="2.420516264568889"/>
<IV_DATA CI_END="1.2237990034618904" CI_START="0.5099921437736562" EFFECT_SIZE="0.7900176436786672" ESTIMABLE="YES" ESTIMATE="-0.2357" LOG_CI_END="0.08771009521528086" LOG_CI_START="-0.29243651398447373" LOG_EFFECT_SIZE="-0.10236320938459645" MODIFIED="2016-02-02 20:53:03 +0800" MODIFIED_BY="[Empty name]" ORDER="42" SE="0.2233" STUDY_ID="STD-Naveed-Sattar_x002c_2009" TOTAL_1="0" TOTAL_2="0" WEIGHT="6.945031118723154"/>
<IV_DATA CI_END="2.804646355829722" CI_START="0.8900501632221611" EFFECT_SIZE="1.5799607421662993" ESTIMABLE="YES" ESTIMATE="0.4574" LOG_CI_END="0.44787810787585725" LOG_CI_START="-0.0505855158307624" LOG_EFFECT_SIZE="0.1986462960225474" MODIFIED="2016-02-02 20:53:23 +0800" MODIFIED_BY="[Empty name]" ORDER="43" SE="0.2928" STUDY_ID="STD-Seth-S.-Martin_x002c_2015_x002c_F" TOTAL_1="0" TOTAL_2="0" WEIGHT="4.4909218583186545"/>
<IV_DATA CI_END="1.4449657228222526" CI_START="0.7200132963046437" EFFECT_SIZE="1.019997320161417" ESTIMABLE="YES" ESTIMATE="0.0198" LOG_CI_END="0.15985754497096427" LOG_CI_START="-0.14265948348759555" LOG_EFFECT_SIZE="0.008599030741684352" MODIFIED="2016-02-02 20:53:42 +0800" MODIFIED_BY="[Empty name]" ORDER="44" SE="0.1777" STUDY_ID="STD-Seth-S.-Martin_x002c_2015_x002c_M" TOTAL_1="0" TOTAL_2="0" WEIGHT="9.626881741600293"/>
</IV_OUTCOME>
<IV_OUTCOME CHI2="21.478780511647766" CI_END="1.479633813250902" CI_START="0.9820252294013607" CI_STUDY="95" CI_TOTAL="95" DF="8" EFFECT_SIZE="1.2054201486982565" ESTIMABLE="YES" I2="62.75393756334693" I2_Q="0.0" ID="CMP-002.02" LOG_CI_END="0.17015424744768712" LOG_CI_START="-0.007877354525634447" LOG_DATA="YES" LOG_EFFECT_SIZE="0.0811384464610263" MODIFIED="2017-02-17 08:57:28 +0800" MODIFIED_BY="[Empty name]" NO="2" P_CHI2="0.005978689218442912" P_Q="1.0" P_Z="0.07401523992224579" Q="0.0" RANDOM="YES" SCALE="100.0" SHOW_PARTICIPANTS="NO" SORT_BY="STUDY" STUDIES="9" SUBGROUPS="NO" SUBGROUP_TEST="YES" TAU2="0.04623197011495364" TOTALS="YES" TOTAL_1="0" TOTAL_2="0" WEIGHT="99.99999999999997" Z="1.7865191467408554">
<NAME>S3. Fig Stroke</NAME>
<GROUP_LABEL_1>Experimental</GROUP_LABEL_1>
<GROUP_LABEL_2>Control</GROUP_LABEL_2>
<GRAPH_LABEL_1>Favours [experimental]</GRAPH_LABEL_1>
<GRAPH_LABEL_2>Favours [control]</GRAPH_LABEL_2>
<EFFECT_MEASURE>Odds Ratio</EFFECT_MEASURE>
<IV_DATA CI_END="1.3358145404083557" CI_START="0.9901080024510429" EFFECT_SIZE="1.150043767101398" ESTIMABLE="YES" ESTIMATE="0.1398" LOG_CI_END="0.12574616647168962" LOG_CI_START="-0.0043174293315404" LOG_EFFECT_SIZE="0.060714368570074576" MODIFIED="2016-02-02 21:31:30 +0800" MODIFIED_BY="[Empty name]" ORDER="45" SE="0.0764" STUDY_ID="STD-Ekim-Seven_x002c_2015" TOTAL_1="0" TOTAL_2="0" WEIGHT="21.00345542453467"/>
<IV_DATA CI_END="1.1327956130942443" CI_START="0.7799787749056137" EFFECT_SIZE="0.9399768797793391" ESTIMABLE="YES" ESTIMATE="-0.0619" LOG_CI_END="0.05415155848424303" LOG_CI_START="-0.10791721534386556" LOG_EFFECT_SIZE="-0.026882828429811306" MODIFIED="2016-02-02 21:32:07 +0800" MODIFIED_BY="[Empty name]" ORDER="46" SE="0.0952" STUDY_ID="STD-Hamidreza-Saber_x002c_2015" TOTAL_1="0" TOTAL_2="0" WEIGHT="19.778049599757388"/>
<IV_DATA CI_END="2.722257470302011" CI_START="1.3400923260078184" EFFECT_SIZE="1.9099938076782295" ESTIMABLE="YES" ESTIMATE="0.6471" LOG_CI_END="0.43492919825284027" LOG_CI_START="0.1271347202263483" LOG_EFFECT_SIZE="0.2810319592395943" MODIFIED="2016-02-02 21:32:43 +0800" MODIFIED_BY="[Empty name]" ORDER="47" SE="0.1808" STUDY_ID="STD-Jiankang-Liu_x002c_2010_x002c_F" TOTAL_1="0" TOTAL_2="0" WEIGHT="13.857311177393225"/>
<IV_DATA CI_END="4.239506072842384" CI_START="0.6499584961526298" EFFECT_SIZE="1.6599707803255384" ESTIMABLE="YES" ESTIMATE="0.5068" LOG_CI_END="0.6273152617025551" LOG_CI_START="-0.187114374845419" LOG_EFFECT_SIZE="0.22010044342856802" MODIFIED="2016-02-02 21:32:26 +0800" MODIFIED_BY="[Empty name]" ORDER="48" SE="0.4784" STUDY_ID="STD-Jiankang-Liu_x002c_2010_x002c_M" TOTAL_1="0" TOTAL_2="0" WEIGHT="3.975402748301318"/>
<IV_DATA CI_END="9.845784053981234" CI_START="1.0401413852455135" EFFECT_SIZE="3.200157412493365" ESTIMABLE="YES" ESTIMATE="1.1632" LOG_CI_END="0.9932503062292609" LOG_CI_START="0.017092376470464094" LOG_EFFECT_SIZE="0.5051713413498625" MODIFIED="2016-02-02 21:35:21 +0800" MODIFIED_BY="[Empty name]" ORDER="49" SE="0.5734" STUDY_ID="STD-Justo-Sierra_x002d_Johnson_x002c_2007_x002c_F" TOTAL_1="0" TOTAL_2="0" WEIGHT="2.916187997828841"/>
<IV_DATA CI_END="4.939205237129392" CI_START="0.3799922447264545" EFFECT_SIZE="1.3699852864981645" ESTIMABLE="YES" ESTIMATE="0.3148" LOG_CI_END="0.6936570726286239" LOG_CI_START="-0.42022526682233663" LOG_EFFECT_SIZE="0.13671590290314367" MODIFIED="2016-02-02 21:35:02 +0800" MODIFIED_BY="[Empty name]" ORDER="50" SE="0.6543" STUDY_ID="STD-Justo-Sierra_x002d_Johnson_x002c_2007_x002c_M" TOTAL_1="0" TOTAL_2="0" WEIGHT="2.3055748868810504"/>
<IV_DATA CI_END="1.631848901131309" CI_START="0.5299812411258414" EFFECT_SIZE="0.9299727447357862" ESTIMABLE="YES" ESTIMATE="-0.0726" LOG_CI_END="0.21267994336216606" LOG_CI_START="-0.27573950213451826" LOG_EFFECT_SIZE="-0.03152977938617608" MODIFIED="2016-02-02 21:33:31 +0800" MODIFIED_BY="[Empty name]" ORDER="51" SE="0.2869" STUDY_ID="STD-Seth-S.-Martin_x002c_2015_x002c_F" TOTAL_1="0" TOTAL_2="0" WEIGHT="8.50783408782168"/>
<IV_DATA CI_END="1.2099362773017925" CI_START="0.4899912746685249" EFFECT_SIZE="0.7699728688614912" ESTIMABLE="YES" ESTIMATE="-0.2614" LOG_CI_END="0.08276249829583578" LOG_CI_START="-0.3098116534348558" LOG_EFFECT_SIZE="-0.11352457756951002" MODIFIED="2016-02-02 21:33:14 +0800" MODIFIED_BY="[Empty name]" ORDER="52" SE="0.2306" STUDY_ID="STD-Seth-S.-Martin_x002c_2015_x002c_M" TOTAL_1="0" TOTAL_2="0" WEIGHT="11.001366298055633"/>
<IV_DATA CI_END="1.8136093568103777" CI_START="1.0500954035389134" EFFECT_SIZE="1.3800227713344961" ESTIMABLE="YES" ESTIMATE="0.3221" LOG_CI_END="0.2585437477451883" LOG_CI_START="0.021228757496886498" LOG_EFFECT_SIZE="0.13988625262103743" MODIFIED="2016-02-02 21:33:53 +0800" MODIFIED_BY="[Empty name]" ORDER="53" SE="0.1394" STUDY_ID="STD-Swapnil-N.Rajpathak_x002c_2011" TOTAL_1="0" TOTAL_2="0" WEIGHT="16.65481777942618"/>
</IV_OUTCOME>
</COMPARISON>
<COMPARISON ID="CMP-003" MODIFIED="2017-02-17 09:35:07 +0800" MODIFIED_BY="[Empty name]" NO="3">
<NAME>further adjustment for other established cardiovascular risk factors</NAME>
<IV_OUTCOME CHI2="35.4412227736104" CI_END="1.399328327733928" CI_START="0.9688178884086169" CI_STUDY="95" CI_TOTAL="95" DF="11" EFFECT_SIZE="1.1643428686025201" ESTIMABLE="YES" I2="68.96269615113104" I2_Q="0.0" ID="CMP-003.01" LOG_CI_END="0.14591962599545055" LOG_CI_START="-0.013757850908119986" LOG_DATA="YES" LOG_EFFECT_SIZE="0.06608088754366534" MODIFIED="2017-02-17 08:50:45 +0800" MODIFIED_BY="[Empty name]" NO="1" P_CHI2="2.0950701268085403E-4" P_Q="1.0" P_Z="0.10475581823293939" Q="0.0" RANDOM="YES" SCALE="16.439131272872576" SHOW_PARTICIPANTS="NO" SORT_BY="STUDY" STUDIES="12" SUBGROUPS="NO" SUBGROUP_TEST="YES" TAU2="0.053622370205845704" TOTALS="YES" TOTAL_1="0" TOTAL_2="0" WEIGHT="100.0" Z="1.6222220210836682">
<NAME>Fig 2 CHD</NAME>
<GROUP_LABEL_1>Experimental</GROUP_LABEL_1>
<GROUP_LABEL_2>Control</GROUP_LABEL_2>
<GRAPH_LABEL_1>Favours [experimental]</GRAPH_LABEL_1>
<GRAPH_LABEL_2>Favours [control]</GRAPH_LABEL_2>
<EFFECT_MEASURE>Odds Ratio</EFFECT_MEASURE>
<IV_DATA CI_END="1.4116807479459723" CI_START="1.0200166856896338" EFFECT_SIZE="1.1999741321260697" ESTIMABLE="YES" ESTIMATE="0.1823" LOG_CI_END="0.14973649198347438" LOG_CI_START="0.008607276118451204" LOG_EFFECT_SIZE="0.07917188405096283" MODIFIED="2016-02-17 10:11:50 +0800" MODIFIED_BY="[Empty name]" ORDER="54" SE="0.0829" STUDY_ID="STD-A.-Michael-Wallace_x002c_2001" TOTAL_1="0" TOTAL_2="0" WEIGHT="14.542685900051596"/>
<IV_DATA CI_END="1.2501204389579725" CI_START="0.7999229264930199" EFFECT_SIZE="1.0" ESTIMABLE="YES" ESTIMATE="0.0" LOG_CI_END="0.09695185577217214" LOG_CI_START="-0.09695185577217214" LOG_EFFECT_SIZE="0.0" MODIFIED="2016-02-17 10:11:49 +0800" MODIFIED_BY="[Empty name]" ORDER="55" SE="0.1139" STUDY_ID="STD-Debbie-A.-Lawlor_x002c_2007" TOTAL_1="0" TOTAL_2="0" WEIGHT="13.210435053001438"/>
<IV_DATA CI_END="1.128160963963007" CI_START="0.7999637687165035" EFFECT_SIZE="0.9499936296895315" ESTIMABLE="YES" ESTIMATE="-0.0513" LOG_CI_END="0.05237106841830607" LOG_CI_START="-0.09692968226157969" LOG_EFFECT_SIZE="-0.022279306921636797" MODIFIED="2016-07-30 18:59:12 +0800" MODIFIED_BY="[Empty name]" ORDER="91" SE="0.0877" STUDY_ID="STD-Ekim-Seven_x002c_2015" TOTAL_1="0" TOTAL_2="0" WEIGHT="14.348459775076286"/>
<IV_DATA CI_END="1.3964664947932457" CI_START="0.6599804181681177" EFFECT_SIZE="0.9600211149716509" ESTIMABLE="YES" ESTIMATE="-0.0408" LOG_CI_END="0.1450305202010278" LOG_CI_START="-0.18046894992433313" LOG_EFFECT_SIZE="-0.017719214861652687" MODIFIED="2016-02-17 10:11:46 +0800" MODIFIED_BY="[Empty name]" ORDER="57" SE="0.1912" STUDY_ID="STD-Jiankang-Liu_x002c_2010_x002c_F" TOTAL_1="0" TOTAL_2="0" WEIGHT="9.755582597902213"/>
<IV_DATA CI_END="2.2537399398770592" CI_START="0.23001953662942795" EFFECT_SIZE="0.7200029282258205" ESTIMABLE="YES" ESTIMATE="-0.3285" LOG_CI_END="0.35290380115447095" LOG_CI_START="-0.6382352757649075" LOG_EFFECT_SIZE="-0.14266573730521823" MODIFIED="2016-02-17 10:11:44 +0800" MODIFIED_BY="[Empty name]" ORDER="58" SE="0.5822" STUDY_ID="STD-Jiankang-Liu_x002c_2010_x002c_M" TOTAL_1="0" TOTAL_2="0" WEIGHT="2.2409658083141477"/>
<IV_DATA CI_END="1.7523058004280836" CI_START="1.1999351085139782" EFFECT_SIZE="1.4500528441358083" ESTIMABLE="YES" ESTIMATE="0.3716" LOG_CI_END="0.24360989854980342" LOG_CI_START="0.07915776040069325" LOG_EFFECT_SIZE="0.1613838294752484" MODIFIED="2016-02-17 11:33:12 +0800" MODIFIED_BY="[Empty name]" ORDER="59" SE="0.0966" STUDY_ID="STD-Jose_x002c_2005" TOTAL_1="0" TOTAL_2="0" WEIGHT="13.974609436609589"/>
<IV_DATA CI_END="12.156784248944138" CI_START="1.2898328181578282" EFFECT_SIZE="3.9598256637827265" ESTIMABLE="YES" ESTIMATE="1.3762" LOG_CI_END="1.0848187091771173" LOG_CI_START="0.11053342281339312" LOG_EFFECT_SIZE="0.5976760659952552" MODIFIED="2016-02-17 10:11:41 +0800" MODIFIED_BY="[Empty name]" ORDER="60" SE="0.5723" STUDY_ID="STD-Justo-Sierra_x002d_Johnson_x002c_2007_x002c_F" TOTAL_1="0" TOTAL_2="0" WEIGHT="2.3081657390200654"/>
<IV_DATA CI_END="7.133264895165102" CI_START="1.399942215073756" EFFECT_SIZE="3.1600883940240174" ESTIMABLE="YES" ESTIMATE="1.1506" LOG_CI_END="0.8532883519293327" LOG_CI_START="0.1461101098264305" LOG_EFFECT_SIZE="0.4996992308778816" MODIFIED="2016-02-17 10:11:39 +0800" MODIFIED_BY="[Empty name]" ORDER="61" SE="0.4154" STUDY_ID="STD-Justo-Sierra_x002d_Johnson_x002c_2007_x002c_M" TOTAL_1="0" TOTAL_2="0" WEIGHT="3.8896384050564055"/>
<IV_DATA CI_END="1.2237990034618904" CI_START="0.5099921437736562" EFFECT_SIZE="0.7900176436786672" ESTIMABLE="YES" ESTIMATE="-0.2357" LOG_CI_END="0.08771009521528086" LOG_CI_START="-0.29243651398447373" LOG_EFFECT_SIZE="-0.10236320938459645" MODIFIED="2016-02-17 10:11:36 +0800" MODIFIED_BY="[Empty name]" ORDER="62" SE="0.2233" STUDY_ID="STD-Naveed-Sattar_x002c_2009" TOTAL_1="0" TOTAL_2="0" WEIGHT="8.50127433971101"/>
<IV_DATA CI_END="46.51067042705371" CI_START="1.7299945222612823" EFFECT_SIZE="8.970128486565994" ESTIMABLE="YES" ESTIMATE="2.1939" LOG_CI_END="1.6675525996850589" LOG_CI_START="0.23804472801002968" LOG_EFFECT_SIZE="0.9527986638475442" MODIFIED="2016-02-17 10:11:34 +0800" MODIFIED_BY="[Empty name]" ORDER="63" SE="0.8397" STUDY_ID="STD-S.-S_x00f6_derberg_x002c_1999" TOTAL_1="0" TOTAL_2="0" WEIGHT="1.1595296981275356"/>
<IV_DATA CI_END="2.489380004192708" CI_START="0.8100707534661149" EFFECT_SIZE="1.4200612436299596" ESTIMABLE="YES" ESTIMATE="0.3507" LOG_CI_END="0.39609119678020516" LOG_CI_START="-0.09147704717326431" LOG_EFFECT_SIZE="0.15230707480347044" MODIFIED="2016-02-17 10:11:33 +0800" MODIFIED_BY="[Empty name]" ORDER="64" SE="0.2864" STUDY_ID="STD-Seth-S.-Martin_x002c_2015_x002c_F" TOTAL_1="0" TOTAL_2="0" WEIGHT="6.485616678125818"/>
<IV_DATA CI_END="1.290690004496665" CI_START="0.6000291974225033" EFFECT_SIZE="0.8800293674187135" ESTIMABLE="YES" ESTIMATE="-0.1278" LOG_CI_END="0.11082194675694723" LOG_CI_START="-0.22182761633141845" LOG_EFFECT_SIZE="-0.05550283478723559" MODIFIED="2016-02-17 10:11:31 +0800" MODIFIED_BY="[Empty name]" ORDER="65" SE="0.1954" STUDY_ID="STD-Seth-S.-Martin_x002c_2015_x002c_M" TOTAL_1="0" TOTAL_2="0" WEIGHT="9.583036569003893"/>
</IV_OUTCOME>
<IV_OUTCOME CHI2="21.3123978585289" CI_END="1.3454329735377362" CI_START="0.8913567558876511" CI_STUDY="95" CI_TOTAL="95" DF="11" EFFECT_SIZE="1.095107652496718" ESTIMABLE="YES" I2="48.38684941498516" I2_Q="0.0" ID="CMP-003.02" LOG_CI_END="0.12886206705869652" LOG_CI_START="-0.04994843950599262" LOG_DATA="YES" LOG_EFFECT_SIZE="0.03945681377635198" MODIFIED="2017-02-17 09:35:07 +0800" MODIFIED_BY="[Empty name]" NO="2" P_CHI2="0.03027526823065252" P_Q="1.0" P_Z="0.3870486826140995" Q="0.0" RANDOM="YES" SCALE="100.0" SHOW_PARTICIPANTS="NO" SORT_BY="STUDY" STUDIES="12" SUBGROUPS="NO" SUBGROUP_TEST="YES" TAU2="0.05193407035354413" TOTALS="YES" TOTAL_1="0" TOTAL_2="0" WEIGHT="100.0" Z="0.8649819905115723">
<NAME>Fig 5 Stroke</NAME>
<GROUP_LABEL_1>Experimental</GROUP_LABEL_1>
<GROUP_LABEL_2>Control</GROUP_LABEL_2>
<GRAPH_LABEL_1>Favours [experimental]</GRAPH_LABEL_1>
<GRAPH_LABEL_2>Favours [control]</GRAPH_LABEL_2>
<EFFECT_MEASURE>Odds Ratio</EFFECT_MEASURE>
<IV_DATA CI_END="1.2379245239070114" CI_START="0.5300222955451369" EFFECT_SIZE="0.810017035544818" ESTIMABLE="YES" ESTIMATE="-0.2107" LOG_CI_END="0.09269416661467966" LOG_CI_START="-0.27570586128870994" LOG_EFFECT_SIZE="-0.09150584733701515" MODIFIED="2016-02-17 09:47:29 +0800" MODIFIED_BY="[Empty name]" ORDER="66" SE="0.2164" STUDY_ID="STD-Christof-Prugger_x002c_2012" TOTAL_1="0" TOTAL_2="0" WEIGHT="11.17035213667858"/>
<IV_DATA CI_END="1.3406894914594742" CI_START="0.8700678973090166" EFFECT_SIZE="1.0800420763926004" ESTIMABLE="YES" ESTIMATE="0.077" LOG_CI_END="0.127328205323149" LOG_CI_START="-0.06044685511004822" LOG_EFFECT_SIZE="0.03344067510655043" MODIFIED="2016-02-17 09:48:55 +0800" MODIFIED_BY="[Empty name]" ORDER="67" SE="0.1103" STUDY_ID="STD-Ekim-Seven_x002c_2015" TOTAL_1="0" TOTAL_2="0" WEIGHT="17.210843483850443"/>
<IV_DATA CI_END="1.2180936329438554" CI_START="0.7100023204794754" EFFECT_SIZE="0.9299727447357862" ESTIMABLE="YES" ESTIMATE="-0.0726" LOG_CI_END="0.0856806731145096" LOG_CI_START="-0.14874023188686175" LOG_EFFECT_SIZE="-0.03152977938617608" MODIFIED="2016-02-17 09:49:36 +0800" MODIFIED_BY="[Empty name]" ORDER="68" SE="0.1377" STUDY_ID="STD-Hamidreza-Saber_x002c_2015" TOTAL_1="0" TOTAL_2="0" WEIGHT="15.561213337981327"/>
<IV_DATA CI_END="3.2073435594379087" CI_START="1.209923285329828" EFFECT_SIZE="1.9699339218909298" ESTIMABLE="YES" ESTIMATE="0.678" LOG_CI_END="0.5061454825279394" LOG_CI_START="0.08275783493287009" LOG_EFFECT_SIZE="0.2944516587304048" MODIFIED="2016-02-17 09:51:11 +0800" MODIFIED_BY="[Empty name]" ORDER="69" SE="0.2487" STUDY_ID="STD-Jiankang-Liu_x002c_2010_x002c_F" TOTAL_1="0" TOTAL_2="0" WEIGHT="9.695570198825859"/>
<IV_DATA CI_END="5.666693981849978" CI_START="0.5099687265149062" EFFECT_SIZE="1.699951973872708" ESTIMABLE="YES" ESTIMATE="0.5306" LOG_CI_END="0.7533297600947514" LOG_CI_START="-0.2924564558990206" LOG_EFFECT_SIZE="0.2304366520978654" MODIFIED="2016-02-17 09:50:42 +0800" MODIFIED_BY="[Empty name]" ORDER="70" SE="0.6143" STUDY_ID="STD-Jiankang-Liu_x002c_2010_x002c_M" TOTAL_1="0" TOTAL_2="0" WEIGHT="2.5698148771475506"/>
<IV_DATA CI_END="9.845784053981234" CI_START="1.0401413852455135" EFFECT_SIZE="3.200157412493365" ESTIMABLE="YES" ESTIMATE="1.1632" LOG_CI_END="0.9932503062292609" LOG_CI_START="0.017092376470464094" LOG_EFFECT_SIZE="0.5051713413498625" MODIFIED="2016-02-17 09:53:11 +0800" MODIFIED_BY="[Empty name]" ORDER="71" SE="0.5734" STUDY_ID="STD-Justo-Sierra_x002d_Johnson_x002c_2007_x002c_F" TOTAL_1="0" TOTAL_2="0" WEIGHT="2.8977019932124626"/>
<IV_DATA CI_END="4.939205237129392" CI_START="0.3799922447264545" EFFECT_SIZE="1.3699852864981645" ESTIMABLE="YES" ESTIMATE="0.3148" LOG_CI_END="0.6936570726286239" LOG_CI_START="-0.42022526682233663" LOG_EFFECT_SIZE="0.13671590290314367" MODIFIED="2016-02-17 09:52:45 +0800" MODIFIED_BY="[Empty name]" ORDER="72" SE="0.6543" STUDY_ID="STD-Justo-Sierra_x002d_Johnson_x002c_2007_x002c_M" TOTAL_1="0" TOTAL_2="0" WEIGHT="2.2981667007234945"/>
<IV_DATA CI_END="3.1378408608856176" CI_START="0.49000732477115877" EFFECT_SIZE="1.2399858893552747" ESTIMABLE="YES" ESTIMATE="0.2151" LOG_CI_END="0.4966309140782667" LOG_CI_START="-0.3097974279634878" LOG_EFFECT_SIZE="0.09341674305738948" MODIFIED="2016-02-17 09:57:18 +0800" MODIFIED_BY="[Empty name]" ORDER="73" SE="0.4737" STUDY_ID="STD-S.-S_x00f6_derberg_x002c_2004_x002c_F" TOTAL_1="0" TOTAL_2="0" WEIGHT="3.9924537825320914"/>
<IV_DATA CI_END="5.603463414850433" CI_START="1.0800584137652631" EFFECT_SIZE="2.460095080974523" ESTIMABLE="YES" ESTIMATE="0.9002" LOG_CI_END="0.7484565407595467" LOG_CI_START="0.03344724445906776" LOG_EFFECT_SIZE="0.3909518926093073" MODIFIED="2016-02-17 09:56:37 +0800" MODIFIED_BY="[Empty name]" ORDER="74" SE="0.42" STUDY_ID="STD-S.-S_x00f6_derberg_x002c_2004_x002c_M" TOTAL_1="0" TOTAL_2="0" WEIGHT="4.83159532620945"/>
<IV_DATA CI_END="1.4513248434333825" CI_START="0.43004009760289186" EFFECT_SIZE="0.7900176436786672" ESTIMABLE="YES" ESTIMATE="-0.2357" LOG_CI_END="0.16176462947497333" LOG_CI_START="-0.3664910482441663" LOG_EFFECT_SIZE="-0.10236320938459645" MODIFIED="2016-02-17 09:59:30 +0800" MODIFIED_BY="[Empty name]" ORDER="75" SE="0.3103" STUDY_ID="STD-Seth-S.-Martin_x002c_2015_x002c_F" TOTAL_1="0" TOTAL_2="0" WEIGHT="7.4431023721948355"/>
<IV_DATA CI_END="1.1394515459042744" CI_START="0.4300099003212555" EFFECT_SIZE="0.699982460976843" ESTIMABLE="YES" ESTIMATE="-0.3567" LOG_CI_END="0.05669586194832325" LOG_CI_START="-0.3665215453381031" LOG_EFFECT_SIZE="-0.15491284169488992" MODIFIED="2016-02-17 09:58:37 +0800" MODIFIED_BY="[Empty name]" ORDER="76" SE="0.2486" STUDY_ID="STD-Seth-S.-Martin_x002c_2015_x002c_M" TOTAL_1="0" TOTAL_2="0" WEIGHT="9.699809494891396"/>
<IV_DATA CI_END="1.3592936935849247" CI_START="0.6500115013330636" EFFECT_SIZE="0.9399768797793391" ESTIMABLE="YES" ESTIMATE="-0.0619" LOG_CI_END="0.1333133020032246" LOG_CI_START="-0.18707895886284714" LOG_EFFECT_SIZE="-0.026882828429811306" MODIFIED="2016-02-17 10:00:29 +0800" MODIFIED_BY="[Empty name]" ORDER="77" SE="0.1882" STUDY_ID="STD-Swapnil-N.Rajpathak_x002c_2011" TOTAL_1="0" TOTAL_2="0" WEIGHT="12.62937629575252"/>
</IV_OUTCOME>
</COMPARISON>
<COMPARISON ID="CMP-004" MODIFIED="2017-02-17 09:31:36 +0800" MODIFIED_BY="[Empty name]" NO="4">
<NAME>cardiovascular risk factors-adjusted data of high methodological quality</NAME>
<IV_OUTCOME CHI2="6.872325846015679" CI_END="1.1940890010346787" CI_START="0.9562114178247504" CI_STUDY="95" CI_TOTAL="95" DF="6" EFFECT_SIZE="1.0685511390140905" ESTIMABLE="YES" I2="12.693313232832537" I2_Q="0.0" ID="CMP-004.01" LOG_CI_END="0.07703669799747694" LOG_CI_START="-0.01944607483320246" LOG_DATA="YES" LOG_EFFECT_SIZE="0.028795311582137266" MODIFIED="2017-02-17 08:49:00 +0800" MODIFIED_BY="[Empty name]" NO="1" P_CHI2="0.3328162339345082" P_Q="1.0" P_Z="0.24203976882930112" Q="0.0" RANDOM="NO" SCALE="100.0" SHOW_PARTICIPANTS="NO" SORT_BY="STUDY" STUDIES="7" SUBGROUPS="NO" SUBGROUP_TEST="YES" TAU2="0.0" TOTALS="YES" TOTAL_1="0" TOTAL_2="0" WEIGHT="100.0" Z="1.1699036412156711">
<NAME>Fig 3 CHD</NAME>
<GROUP_LABEL_1>Experimental</GROUP_LABEL_1>
<GROUP_LABEL_2>Control</GROUP_LABEL_2>
<GRAPH_LABEL_1>Favours [experimental]</GRAPH_LABEL_1>
<GRAPH_LABEL_2>Favours [control]</GRAPH_LABEL_2>
<EFFECT_MEASURE>Odds Ratio</EFFECT_MEASURE>
<IV_DATA CI_END="1.4116807479459723" CI_START="1.0200166856896338" EFFECT_SIZE="1.1999741321260697" ESTIMABLE="YES" ESTIMATE="0.1823" LOG_CI_END="0.14973649198347438" LOG_CI_START="0.008607276118451204" LOG_EFFECT_SIZE="0.07917188405096283" MODIFIED="2016-02-17 10:02:10 +0800" MODIFIED_BY="[Empty name]" ORDER="54" SE="0.0829" STUDY_ID="STD-A.-Michael-Wallace_x002c_2001" TOTAL_1="0" TOTAL_2="0" WEIGHT="46.737523375233046"/>
<IV_DATA CI_END="1.2501204389579725" CI_START="0.7999229264930199" EFFECT_SIZE="1.0" ESTIMABLE="YES" ESTIMATE="0.0" LOG_CI_END="0.09695185577217214" LOG_CI_START="-0.09695185577217214" LOG_EFFECT_SIZE="0.0" MODIFIED="2016-02-17 10:02:10 +0800" MODIFIED_BY="[Empty name]" ORDER="55" SE="0.1139" STUDY_ID="STD-Debbie-A.-Lawlor_x002c_2007" TOTAL_1="0" TOTAL_2="0" WEIGHT="24.758669829532195"/>
<IV_DATA CI_END="1.3964664947932457" CI_START="0.6599804181681177" EFFECT_SIZE="0.9600211149716509" ESTIMABLE="YES" ESTIMATE="-0.0408" LOG_CI_END="0.1450305202010278" LOG_CI_START="-0.18046894992433313" LOG_EFFECT_SIZE="-0.017719214861652687" MODIFIED="2016-02-17 10:02:10 +0800" MODIFIED_BY="[Empty name]" ORDER="57" SE="0.1912" STUDY_ID="STD-Jiankang-Liu_x002c_2010_x002c_F" TOTAL_1="0" TOTAL_2="0" WEIGHT="8.78615742839721"/>
<IV_DATA CI_END="2.2537399398770592" CI_START="0.23001953662942795" EFFECT_SIZE="0.7200029282258205" ESTIMABLE="YES" ESTIMATE="-0.3285" LOG_CI_END="0.35290380115447095" LOG_CI_START="-0.6382352757649075" LOG_EFFECT_SIZE="-0.14266573730521823" MODIFIED="2016-02-17 10:02:10 +0800" MODIFIED_BY="[Empty name]" ORDER="58" SE="0.5822" STUDY_ID="STD-Jiankang-Liu_x002c_2010_x002c_M" TOTAL_1="0" TOTAL_2="0" WEIGHT="0.9476115691283448"/>
<IV_DATA CI_END="1.2237990034618904" CI_START="0.5099921437736562" EFFECT_SIZE="0.7900176436786672" ESTIMABLE="YES" ESTIMATE="-0.2357" LOG_CI_END="0.08771009521528086" LOG_CI_START="-0.29243651398447373" LOG_EFFECT_SIZE="-0.10236320938459645" MODIFIED="2016-02-17 10:02:10 +0800" MODIFIED_BY="[Empty name]" ORDER="62" SE="0.2233" STUDY_ID="STD-Naveed-Sattar_x002c_2009" TOTAL_1="0" TOTAL_2="0" WEIGHT="6.4416527605837794"/>
<IV_DATA CI_END="2.489380004192708" CI_START="0.8100707534661149" EFFECT_SIZE="1.4200612436299596" ESTIMABLE="YES" ESTIMATE="0.3507" LOG_CI_END="0.39609119678020516" LOG_CI_START="-0.09147704717326431" LOG_EFFECT_SIZE="0.15230707480347044" MODIFIED="2016-02-17 10:02:10 +0800" MODIFIED_BY="[Empty name]" ORDER="64" SE="0.2864" STUDY_ID="STD-Seth-S.-Martin_x002c_2015_x002c_F" TOTAL_1="0" TOTAL_2="0" WEIGHT="3.915874180483421"/>
<IV_DATA CI_END="1.290690004496665" CI_START="0.6000291974225033" EFFECT_SIZE="0.8800293674187135" ESTIMABLE="YES" ESTIMATE="-0.1278" LOG_CI_END="0.11082194675694723" LOG_CI_START="-0.22182761633141845" LOG_EFFECT_SIZE="-0.05550283478723559" MODIFIED="2016-02-17 10:02:10 +0800" MODIFIED_BY="[Empty name]" ORDER="65" SE="0.1954" STUDY_ID="STD-Seth-S.-Martin_x002c_2015_x002c_M" TOTAL_1="0" TOTAL_2="0" WEIGHT="8.412510856642003"/>
</IV_OUTCOME>
<IV_OUTCOME CHI2="11.91011061182599" CI_END="1.2514575908455292" CI_START="0.7636962133335812" CI_STUDY="95" CI_TOTAL="95" DF="6" EFFECT_SIZE="0.9776161942584097" ESTIMABLE="YES" I2="49.62263411691259" I2_Q="0.0" ID="CMP-004.02" LOG_CI_END="0.09741613690561704" LOG_CI_START="-0.11707936277229662" LOG_DATA="YES" LOG_EFFECT_SIZE="-0.009831612933339813" MODIFIED="2017-02-17 09:06:11 +0800" MODIFIED_BY="[Empty name]" NO="2" P_CHI2="0.06400452098530773" P_Q="1.0" P_Z="0.8574086889240422" Q="0.0" RANDOM="YES" SCALE="100.0" SHOW_PARTICIPANTS="NO" SORT_BY="STUDY" STUDIES="7" SUBGROUPS="NO" SUBGROUP_TEST="YES" TAU2="0.050915407303135665" TOTALS="YES" TOTAL_1="0" TOTAL_2="0" WEIGHT="100.00000000000003" Z="0.17967376740509206">
<NAME>Fig 6 Stroke</NAME>
<GROUP_LABEL_1>Experimental</GROUP_LABEL_1>
<GROUP_LABEL_2>Control</GROUP_LABEL_2>
<GRAPH_LABEL_1>Favours [experimental]</GRAPH_LABEL_1>
<GRAPH_LABEL_2>Favours [control]</GRAPH_LABEL_2>
<EFFECT_MEASURE>Odds Ratio</EFFECT_MEASURE>
<IV_DATA CI_END="1.2379245239070114" CI_START="0.5300222955451369" EFFECT_SIZE="0.810017035544818" ESTIMABLE="YES" ESTIMATE="-0.2107" LOG_CI_END="0.09269416661467966" LOG_CI_START="-0.27570586128870994" LOG_EFFECT_SIZE="-0.09150584733701515" MODIFIED="2016-02-19 18:16:57 +0800" MODIFIED_BY="[Empty name]" ORDER="66" SE="0.2164" STUDY_ID="STD-Christof-Prugger_x002c_2012" TOTAL_1="0" TOTAL_2="0" WEIGHT="16.24126429283116"/>
<IV_DATA CI_END="1.2180936329438554" CI_START="0.7100023204794754" EFFECT_SIZE="0.9299727447357862" ESTIMABLE="YES" ESTIMATE="-0.0726" LOG_CI_END="0.0856806731145096" LOG_CI_START="-0.14874023188686175" LOG_EFFECT_SIZE="-0.03152977938617608" MODIFIED="2016-02-17 10:04:08 +0800" MODIFIED_BY="[Empty name]" ORDER="68" SE="0.1377" STUDY_ID="STD-Hamidreza-Saber_x002c_2015" TOTAL_1="0" TOTAL_2="0" WEIGHT="22.718476456020962"/>
<IV_DATA CI_END="3.2073435594379087" CI_START="1.209923285329828" EFFECT_SIZE="1.9699339218909298" ESTIMABLE="YES" ESTIMATE="0.678" LOG_CI_END="0.5061454825279394" LOG_CI_START="0.08275783493287009" LOG_EFFECT_SIZE="0.2944516587304048" MODIFIED="2016-02-19 18:16:46 +0800" MODIFIED_BY="[Empty name]" ORDER="69" SE="0.2487" STUDY_ID="STD-Jiankang-Liu_x002c_2010_x002c_F" TOTAL_1="0" TOTAL_2="0" WEIGHT="14.077617855484592"/>
<IV_DATA CI_END="5.666693981849978" CI_START="0.5099687265149062" EFFECT_SIZE="1.699951973872708" ESTIMABLE="YES" ESTIMATE="0.5306" LOG_CI_END="0.7533297600947514" LOG_CI_START="-0.2924564558990206" LOG_EFFECT_SIZE="0.2304366520978654" MODIFIED="2016-02-19 18:16:45 +0800" MODIFIED_BY="[Empty name]" ORDER="70" SE="0.6143" STUDY_ID="STD-Jiankang-Liu_x002c_2010_x002c_M" TOTAL_1="0" TOTAL_2="0" WEIGHT="3.7066696627653473"/>
<IV_DATA CI_END="1.4513248434333825" CI_START="0.43004009760289186" EFFECT_SIZE="0.7900176436786672" ESTIMABLE="YES" ESTIMATE="-0.2357" LOG_CI_END="0.16176462947497333" LOG_CI_START="-0.3664910482441663" LOG_EFFECT_SIZE="-0.10236320938459645" MODIFIED="2016-02-17 10:04:08 +0800" MODIFIED_BY="[Empty name]" ORDER="75" SE="0.3103" STUDY_ID="STD-Seth-S.-Martin_x002c_2015_x002c_F" TOTAL_1="0" TOTAL_2="0" WEIGHT="10.784483389028503"/>
<IV_DATA CI_END="1.1394515459042744" CI_START="0.4300099003212555" EFFECT_SIZE="0.699982460976843" ESTIMABLE="YES" ESTIMATE="-0.3567" LOG_CI_END="0.05669586194832325" LOG_CI_START="-0.3665215453381031" LOG_EFFECT_SIZE="-0.15491284169488992" MODIFIED="2016-02-19 18:16:55 +0800" MODIFIED_BY="[Empty name]" ORDER="76" SE="0.2486" STUDY_ID="STD-Seth-S.-Martin_x002c_2015_x002c_M" TOTAL_1="0" TOTAL_2="0" WEIGHT="14.083828787772166"/>
<IV_DATA CI_END="1.3592936935849247" CI_START="0.6500115013330636" EFFECT_SIZE="0.9399768797793391" ESTIMABLE="YES" ESTIMATE="-0.0619" LOG_CI_END="0.1333133020032246" LOG_CI_START="-0.18707895886284714" LOG_EFFECT_SIZE="-0.026882828429811306" MODIFIED="2016-02-19 18:16:53 +0800" MODIFIED_BY="[Empty name]" ORDER="77" SE="0.1882" STUDY_ID="STD-Swapnil-N.Rajpathak_x002c_2011" TOTAL_1="0" TOTAL_2="0" WEIGHT="18.387659556097283"/>
</IV_OUTCOME>
</COMPARISON>
<COMPARISON ID="CMP-005" MODIFIED="2017-02-17 09:32:00 +0800" MODIFIED_BY="[Empty name]" NO="5">
<NAME>subgroup meta-analysis</NAME>
<IV_OUTCOME CHI2="6.872325846015679" CI_END="1.194089001034679" CI_START="0.9562114178247505" CI_STUDY="95" CI_TOTAL="95" DF="6" EFFECT_SIZE="1.0685511390140905" ESTIMABLE="YES" I2="12.693313232832537" I2_Q="0.0" ID="CMP-005.01" LOG_CI_END="0.07703669799747702" LOG_CI_START="-0.019446074833202407" LOG_DATA="YES" LOG_EFFECT_SIZE="0.028795311582137266" MODIFIED="2017-02-17 08:49:50 +0800" MODIFIED_BY="[Empty name]" NO="1" P_CHI2="0.3328162339345082" P_Q="0.592305475402741" P_Z="0.2420397688293009" Q="0.28675831778591476" RANDOM="NO" SCALE="255.31661653022172" SHOW_PARTICIPANTS="NO" SORT_BY="STUDY" STUDIES="7" SUBGROUPS="YES" SUBGROUP_TEST="YES" TAU2="0.0" TOTALS="SUB" TOTAL_1="0" TOTAL_2="0" WEIGHT="200.0" Z="1.1699036412156714">
<NAME>Fig 4 CHD</NAME>
<GROUP_LABEL_1>Experimental</GROUP_LABEL_1>
<GROUP_LABEL_2>Control</GROUP_LABEL_2>
<GRAPH_LABEL_1>Favours [experimental]</GRAPH_LABEL_1>
<GRAPH_LABEL_2>Favours [control]</GRAPH_LABEL_2>
<EFFECT_MEASURE>Odds Ratio</EFFECT_MEASURE>
<IV_SUBGROUP CHI2="5.126196167051723" CI_END="1.2589200845075967" CI_START="0.9505925054088902" DF="3" EFFECT_SIZE="1.0939469810012037" ESTIMABLE="YES" I2="41.47707379436051" ID="CMP-005.01.01" LOG_CI_END="0.09999816222944222" LOG_CI_START="-0.022005614060189332" LOG_EFFECT_SIZE="0.0389962740846264" MODIFIED="2016-02-19 22:29:25 +0800" MODIFIED_BY="[Empty name]" NO="1" P_CHI2="0.1627864930045737" P_Z="0.2102300317608342" STUDIES="4" TAU2="0.0" TOTAL_1="0" TOTAL_2="0" WEIGHT="100.0" Z="1.2529332297989852">
<NAME>male</NAME>
<IV_DATA CI_END="1.4116807479459723" CI_START="1.0200166856896338" EFFECT_SIZE="1.1999741321260697" ESTIMABLE="YES" ESTIMATE="0.1823" LOG_CI_END="0.14973649198347438" LOG_CI_START="0.008607276118451204" LOG_EFFECT_SIZE="0.07917188405096283" MODIFIED="2016-02-19 22:19:11 +0800" MODIFIED_BY="[Empty name]" ORDER="54" SE="0.0829" STUDY_ID="STD-A.-Michael-Wallace_x002c_2001" TOTAL_1="0" TOTAL_2="0" WEIGHT="74.73304698038318"/>
<IV_DATA CI_END="2.2537399398770592" CI_START="0.23001953662942795" EFFECT_SIZE="0.7200029282258205" ESTIMABLE="YES" ESTIMATE="-0.3285" LOG_CI_END="0.35290380115447095" LOG_CI_START="-0.6382352757649075" LOG_EFFECT_SIZE="-0.14266573730521823" MODIFIED="2016-02-19 22:18:20 +0800" MODIFIED_BY="[Empty name]" ORDER="58" SE="0.5822" STUDY_ID="STD-Jiankang-Liu_x002c_2010_x002c_M" TOTAL_1="0" TOTAL_2="0" WEIGHT="1.5152257715125477"/>
<IV_DATA CI_END="1.2237990034618904" CI_START="0.5099921437736562" EFFECT_SIZE="0.7900176436786672" ESTIMABLE="YES" ESTIMATE="-0.2357" LOG_CI_END="0.08771009521528086" LOG_CI_START="-0.29243651398447373" LOG_EFFECT_SIZE="-0.10236320938459645" MODIFIED="2016-02-19 22:20:36 +0800" MODIFIED_BY="[Empty name]" ORDER="62" SE="0.2233" STUDY_ID="STD-Naveed-Sattar_x002c_2009" TOTAL_1="0" TOTAL_2="0" WEIGHT="10.30016790840754"/>
<IV_DATA CI_END="1.290690004496665" CI_START="0.6000291974225033" EFFECT_SIZE="0.8800293674187135" ESTIMABLE="YES" ESTIMATE="-0.1278" LOG_CI_END="0.11082194675694723" LOG_CI_START="-0.22182761633141845" LOG_EFFECT_SIZE="-0.05550283478723559" MODIFIED="2016-02-19 22:18:20 +0800" MODIFIED_BY="[Empty name]" ORDER="65" SE="0.1954" STUDY_ID="STD-Seth-S.-Martin_x002c_2015_x002c_M" TOTAL_1="0" TOTAL_2="0" WEIGHT="13.451559339696733"/>
</IV_SUBGROUP>
<IV_SUBGROUP CHI2="1.4593713611780408" CI_END="1.2319251880904631" CI_START="0.8569312991029158" DF="2" EFFECT_SIZE="1.0274605840751092" ESTIMABLE="YES" I2="0.0" ID="CMP-005.01.02" LOG_CI_END="0.09058433495015569" LOG_CI_START="-0.06705399443208641" LOG_EFFECT_SIZE="0.011765170259034664" MODIFIED="2016-02-19 22:29:34 +0800" MODIFIED_BY="[Empty name]" NO="2" P_CHI2="0.48206057123825363" P_Z="0.7698587332692886" STUDIES="3" TAU2="0.0" TOTAL_1="0" TOTAL_2="0" WEIGHT="100.0" Z="0.29255968481847283">
<NAME>female</NAME>
<IV_DATA CI_END="1.2501204389579725" CI_START="0.7999229264930199" EFFECT_SIZE="1.0" ESTIMABLE="YES" ESTIMATE="0.0" LOG_CI_END="0.09695185577217214" LOG_CI_START="-0.09695185577217214" LOG_EFFECT_SIZE="0.0" MODIFIED="2016-02-19 22:19:33 +0800" MODIFIED_BY="[Empty name]" ORDER="55" SE="0.1139" STUDY_ID="STD-Debbie-A.-Lawlor_x002c_2007" TOTAL_1="0" TOTAL_2="0" WEIGHT="66.09238182642315"/>
<IV_DATA CI_END="1.3964664947932457" CI_START="0.6599804181681177" EFFECT_SIZE="0.9600211149716509" ESTIMABLE="YES" ESTIMATE="-0.0408" LOG_CI_END="0.1450305202010278" LOG_CI_START="-0.18046894992433313" LOG_EFFECT_SIZE="-0.017719214861652687" MODIFIED="2016-02-19 22:18:34 +0800" MODIFIED_BY="[Empty name]" ORDER="57" SE="0.1912" STUDY_ID="STD-Jiankang-Liu_x002c_2010_x002c_F" TOTAL_1="0" TOTAL_2="0" WEIGHT="23.45433238307636"/>
<IV_DATA CI_END="2.489380004192708" CI_START="0.8100707534661149" EFFECT_SIZE="1.4200612436299596" ESTIMABLE="YES" ESTIMATE="0.3507" LOG_CI_END="0.39609119678020516" LOG_CI_START="-0.09147704717326431" LOG_EFFECT_SIZE="0.15230707480347044" MODIFIED="2016-02-19 22:18:34 +0800" MODIFIED_BY="[Empty name]" ORDER="64" SE="0.2864" STUDY_ID="STD-Seth-S.-Martin_x002c_2015_x002c_F" TOTAL_1="0" TOTAL_2="0" WEIGHT="10.453285790500491"/>
</IV_SUBGROUP>
</IV_OUTCOME>
<IV_OUTCOME CHI2="11.82363140990555" CI_END="1.196043386050746" CI_START="0.7999410668534386" CI_STUDY="95" CI_TOTAL="95" DF="5" EFFECT_SIZE="0.9781432524126682" ESTIMABLE="YES" I2="57.71180759397556" I2_Q="63.5684905171236" ID="CMP-005.02" LOG_CI_END="0.07774693381683781" LOG_CI_START="-0.09694200711195768" LOG_DATA="YES" LOG_EFFECT_SIZE="-0.009597536647559959" MODIFIED="2017-02-17 08:52:00 +0800" MODIFIED_BY="[Empty name]" NO="2" P_CHI2="0.03728604604622665" P_Q="0.09756668476616825" P_Z="0.8294837886179306" Q="2.744876658130297" RANDOM="NO" SCALE="100.0" SHOW_PARTICIPANTS="NO" SORT_BY="STUDY" STUDIES="6" SUBGROUPS="YES" SUBGROUP_TEST="YES" TAU2="0.0" TOTALS="SUB" TOTAL_1="0" TOTAL_2="0" WEIGHT="200.00000000000003" Z="0.21536367522187033">
<NAME>Fig 7stroke</NAME>
<GROUP_LABEL_1>Experimental</GROUP_LABEL_1>
<GROUP_LABEL_2>Control</GROUP_LABEL_2>
<GRAPH_LABEL_1>Favours [experimental]</GRAPH_LABEL_1>
<GRAPH_LABEL_2>Favours [control]</GRAPH_LABEL_2>
<EFFECT_MEASURE>Odds Ratio</EFFECT_MEASURE>
<IV_SUBGROUP CHI2="1.7971867884558264" CI_END="1.09262160688418" CI_START="0.5887304164658467" DF="2" EFFECT_SIZE="0.8020346461721626" ESTIMABLE="YES" I2="0.0" ID="CMP-005.02.01" LOG_CI_END="0.03846978455288805" LOG_CI_START="-0.23008352599854284" LOG_EFFECT_SIZE="-0.09580687072282737" MODIFIED="2016-02-19 22:31:02 +0800" MODIFIED_BY="[Empty name]" NO="1" P_CHI2="0.40714198727938855" P_Z="0.16198059788676597" STUDIES="3" TAU2="0.0" TOTAL_1="0" TOTAL_2="0" WEIGHT="100.00000000000001" Z="1.3984412681612803">
<NAME>male</NAME>
<IV_DATA CI_END="1.2379245239070114" CI_START="0.5300222955451369" EFFECT_SIZE="0.810017035544818" ESTIMABLE="YES" ESTIMATE="-0.2107" LOG_CI_END="0.09269416661467966" LOG_CI_START="-0.27570586128870994" LOG_EFFECT_SIZE="-0.09150584733701515" MODIFIED="2016-02-19 22:22:51 +0800" MODIFIED_BY="[Empty name]" ORDER="66" SE="0.2164" STUDY_ID="STD-Christof-Prugger_x002c_2012" TOTAL_1="0" TOTAL_2="0" WEIGHT="53.140019819662555"/>
<IV_DATA CI_END="5.666693981849978" CI_START="0.5099687265149062" EFFECT_SIZE="1.699951973872708" ESTIMABLE="YES" ESTIMATE="0.5306" LOG_CI_END="0.7533297600947514" LOG_CI_START="-0.2924564558990206" LOG_EFFECT_SIZE="0.2304366520978654" MODIFIED="2016-02-19 22:24:32 +0800" MODIFIED_BY="[Empty name]" ORDER="70" SE="0.6143" STUDY_ID="STD-Jiankang-Liu_x002c_2010_x002c_M" TOTAL_1="0" TOTAL_2="0" WEIGHT="6.594398594669535"/>
<IV_DATA CI_END="1.1394515459042744" CI_START="0.4300099003212555" EFFECT_SIZE="0.699982460976843" ESTIMABLE="YES" ESTIMATE="-0.3567" LOG_CI_END="0.05669586194832325" LOG_CI_START="-0.3665215453381031" LOG_EFFECT_SIZE="-0.15491284169488992" MODIFIED="2016-02-19 22:22:15 +0800" MODIFIED_BY="[Empty name]" ORDER="76" SE="0.2486" STUDY_ID="STD-Seth-S.-Martin_x002c_2015_x002c_M" TOTAL_1="0" TOTAL_2="0" WEIGHT="40.265581585667924"/>
</IV_SUBGROUP>
<IV_SUBGROUP CHI2="7.281567963319427" CI_END="1.4744655028724776" CI_START="0.8682326989761417" DF="2" EFFECT_SIZE="1.131450026782529" ESTIMABLE="YES" I2="72.53338827468328" ID="CMP-005.02.02" LOG_CI_END="0.16863461609610153" LOG_CI_START="-0.06136386199250037" LOG_EFFECT_SIZE="0.05363537705180061" MODIFIED="2016-02-19 22:31:18 +0800" MODIFIED_BY="[Empty name]" NO="2" P_CHI2="0.026231834533451015" P_Z="0.3606524209767089" STUDIES="3" TAU2="0.0" TOTAL_1="0" TOTAL_2="0" WEIGHT="100.00000000000001" Z="0.914122634135507">
<NAME>female</NAME>
<IV_DATA CI_END="3.2073435594379087" CI_START="1.209923285329828" EFFECT_SIZE="1.9699339218909298" ESTIMABLE="YES" ESTIMATE="0.678" LOG_CI_END="0.5061454825279394" LOG_CI_START="0.08275783493287009" LOG_EFFECT_SIZE="0.2944516587304048" MODIFIED="2016-02-19 22:30:41 +0800" MODIFIED_BY="[Empty name]" ORDER="69" SE="0.2487" STUDY_ID="STD-Jiankang-Liu_x002c_2010_x002c_F" TOTAL_1="0" TOTAL_2="0" WEIGHT="29.510295482250648"/>
<IV_DATA CI_END="1.4513248434333825" CI_START="0.43004009760289186" EFFECT_SIZE="0.7900176436786672" ESTIMABLE="YES" ESTIMATE="-0.2357" LOG_CI_END="0.16176462947497333" LOG_CI_START="-0.3664910482441663" LOG_EFFECT_SIZE="-0.10236320938459645" MODIFIED="2016-02-19 22:22:09 +0800" MODIFIED_BY="[Empty name]" ORDER="75" SE="0.3103" STUDY_ID="STD-Seth-S.-Martin_x002c_2015_x002c_F" TOTAL_1="0" TOTAL_2="0" WEIGHT="18.956649376629244"/>
<IV_DATA CI_END="1.3592936935849247" CI_START="0.6500115013330636" EFFECT_SIZE="0.9399768797793391" ESTIMABLE="YES" ESTIMATE="-0.0619" LOG_CI_END="0.1333133020032246" LOG_CI_START="-0.18707895886284714" LOG_EFFECT_SIZE="-0.026882828429811306" MODIFIED="2016-02-19 22:23:22 +0800" MODIFIED_BY="[Empty name]" ORDER="77" SE="0.1882" STUDY_ID="STD-Swapnil-N.Rajpathak_x002c_2011" TOTAL_1="0" TOTAL_2="0" WEIGHT="51.533055141120116"/>
</IV_SUBGROUP>
</IV_OUTCOME>
</COMPARISON>
<COMPARISON ID="CMP-006" MODIFIED="2017-02-17 09:31:12 +0800" MODIFIED_BY="[Empty name]" NO="6">
<NAME>further adjustment for other established cardiovascular risk factors excluding case-control studies</NAME>
<IV_OUTCOME CHI2="14.750277573638966" CI_END="1.193277309917221" CI_START="0.8811864645040509" CI_STUDY="95" CI_TOTAL="95" DF="8" EFFECT_SIZE="1.0254266496921467" ESTIMABLE="YES" I2="45.76373251241563" I2_Q="0.0" ID="CMP-006.01" LOG_CI_END="0.07674138262397288" LOG_CI_START="-0.05493218246583184" LOG_DATA="YES" LOG_EFFECT_SIZE="0.010904600079070521" MODIFIED="2017-02-17 08:55:27 +0800" MODIFIED_BY="[Empty name]" NO="1" P_CHI2="0.06418703040127427" P_Q="1.0" P_Z="0.7454607897191181" Q="0.0" RANDOM="YES" SCALE="4.755964778897011" SHOW_PARTICIPANTS="NO" SORT_BY="STUDY" STUDIES="9" SUBGROUPS="NO" SUBGROUP_TEST="YES" TAU2="0.01992153528243824" TOTALS="YES" TOTAL_1="0" TOTAL_2="0" WEIGHT="99.99999999999997" Z="0.324630435975728">
<NAME>S2. Fig CHD</NAME>
<GROUP_LABEL_1>Experimental</GROUP_LABEL_1>
<GROUP_LABEL_2>Control</GROUP_LABEL_2>
<GRAPH_LABEL_1>Favours [experimental]</GRAPH_LABEL_1>
<GRAPH_LABEL_2>Favours [control]</GRAPH_LABEL_2>
<EFFECT_MEASURE>Odds Ratio</EFFECT_MEASURE>
<IV_DATA CI_END="1.4116807479459723" CI_START="1.0200166856896338" EFFECT_SIZE="1.1999741321260697" ESTIMABLE="YES" ESTIMATE="0.1823" LOG_CI_END="0.14973649198347438" LOG_CI_START="0.008607276118451204" LOG_EFFECT_SIZE="0.07917188405096283" MODIFIED="2016-07-30 19:05:18 +0800" MODIFIED_BY="[Empty name]" ORDER="54" SE="0.0829" STUDY_ID="STD-A.-Michael-Wallace_x002c_2001" TOTAL_1="0" TOTAL_2="0" WEIGHT="22.327275259841638"/>
<IV_DATA CI_END="1.2501204389579725" CI_START="0.7999229264930199" EFFECT_SIZE="1.0" ESTIMABLE="YES" ESTIMATE="0.0" LOG_CI_END="0.09695185577217214" LOG_CI_START="-0.09695185577217214" LOG_EFFECT_SIZE="0.0" MODIFIED="2016-07-30 19:05:18 +0800" MODIFIED_BY="[Empty name]" ORDER="55" SE="0.1139" STUDY_ID="STD-Debbie-A.-Lawlor_x002c_2007" TOTAL_1="0" TOTAL_2="0" WEIGHT="18.186363398822802"/>
<IV_DATA CI_END="1.128160963963007" CI_START="0.7999637687165035" EFFECT_SIZE="0.9499936296895315" ESTIMABLE="YES" ESTIMATE="-0.0513" LOG_CI_END="0.05237106841830607" LOG_CI_START="-0.09692968226157969" LOG_EFFECT_SIZE="-0.022279306921636797" MODIFIED="2016-07-30 19:05:18 +0800" MODIFIED_BY="[Empty name]" ORDER="91" SE="0.0877" STUDY_ID="STD-Ekim-Seven_x002c_2015" TOTAL_1="0" TOTAL_2="0" WEIGHT="21.665142393039076"/>
<IV_DATA CI_END="1.3964664947932457" CI_START="0.6599804181681177" EFFECT_SIZE="0.9600211149716509" ESTIMABLE="YES" ESTIMATE="-0.0408" LOG_CI_END="0.1450305202010278" LOG_CI_START="-0.18046894992433313" LOG_EFFECT_SIZE="-0.017719214861652687" MODIFIED="2016-07-30 19:05:18 +0800" MODIFIED_BY="[Empty name]" ORDER="57" SE="0.1912" STUDY_ID="STD-Jiankang-Liu_x002c_2010_x002c_F" TOTAL_1="0" TOTAL_2="0" WEIGHT="10.592185651855326"/>
<IV_DATA CI_END="2.2537399398770592" CI_START="0.23001953662942795" EFFECT_SIZE="0.7200029282258205" ESTIMABLE="YES" ESTIMATE="-0.3285" LOG_CI_END="0.35290380115447095" LOG_CI_START="-0.6382352757649075" LOG_EFFECT_SIZE="-0.14266573730521823" MODIFIED="2016-07-30 19:05:18 +0800" MODIFIED_BY="[Empty name]" ORDER="58" SE="0.5822" STUDY_ID="STD-Jiankang-Liu_x002c_2010_x002c_M" TOTAL_1="0" TOTAL_2="0" WEIGHT="1.666959707860137"/>
<IV_DATA CI_END="1.2237990034618904" CI_START="0.5099921437736562" EFFECT_SIZE="0.7900176436786672" ESTIMABLE="YES" ESTIMATE="-0.2357" LOG_CI_END="0.08771009521528086" LOG_CI_START="-0.29243651398447373" LOG_EFFECT_SIZE="-0.10236320938459645" MODIFIED="2016-07-30 19:05:18 +0800" MODIFIED_BY="[Empty name]" ORDER="62" SE="0.2233" STUDY_ID="STD-Naveed-Sattar_x002c_2009" TOTAL_1="0" TOTAL_2="0" WEIGHT="8.572626186959289"/>
<IV_DATA CI_END="46.51067042705371" CI_START="1.7299945222612823" EFFECT_SIZE="8.970128486565994" ESTIMABLE="YES" ESTIMATE="2.1939" LOG_CI_END="1.6675525996850589" LOG_CI_START="0.23804472801002968" LOG_EFFECT_SIZE="0.9527986638475442" MODIFIED="2016-07-30 19:05:18 +0800" MODIFIED_BY="[Empty name]" ORDER="63" SE="0.8397" STUDY_ID="STD-S.-S_x00f6_derberg_x002c_1999" TOTAL_1="0" TOTAL_2="0" WEIGHT="0.8251327564417277"/>
<IV_DATA CI_END="2.489380004192708" CI_START="0.8100707534661149" EFFECT_SIZE="1.4200612436299596" ESTIMABLE="YES" ESTIMATE="0.3507" LOG_CI_END="0.39609119678020516" LOG_CI_START="-0.09147704717326431" LOG_EFFECT_SIZE="0.15230707480347044" MODIFIED="2016-07-30 19:05:18 +0800" MODIFIED_BY="[Empty name]" ORDER="64" SE="0.2864" STUDY_ID="STD-Seth-S.-Martin_x002c_2015_x002c_F" TOTAL_1="0" TOTAL_2="0" WEIGHT="5.868134946284796"/>
<IV_DATA CI_END="1.290690004496665" CI_START="0.6000291974225033" EFFECT_SIZE="0.8800293674187135" ESTIMABLE="YES" ESTIMATE="-0.1278" LOG_CI_END="0.11082194675694723" LOG_CI_START="-0.22182761633141845" LOG_EFFECT_SIZE="-0.05550283478723559" MODIFIED="2016-07-30 19:05:18 +0800" MODIFIED_BY="[Empty name]" ORDER="65" SE="0.1954" STUDY_ID="STD-Seth-S.-Martin_x002c_2015_x002c_M" TOTAL_1="0" TOTAL_2="0" WEIGHT="10.296179698895191"/>
</IV_OUTCOME>
<IV_OUTCOME CHI2="17.261366416884393" CI_END="1.1658298364038195" CI_START="0.9052171925257706" CI_STUDY="95" CI_TOTAL="95" DF="9" EFFECT_SIZE="1.0272921743458596" ESTIMABLE="YES" I2="47.8604428952012" I2_Q="0.0" ID="CMP-006.02" LOG_CI_END="0.06663516577132006" LOG_CI_START="-0.043247206210718175" LOG_DATA="YES" LOG_EFFECT_SIZE="0.011693979780300965" MODIFIED="2017-02-17 09:10:55 +0800" MODIFIED_BY="[Empty name]" NO="2" P_CHI2="0.04477697032881989" P_Q="1.0" P_Z="0.6765545385438383" Q="0.0" RANDOM="NO" SCALE="100.0" SHOW_PARTICIPANTS="NO" SORT_BY="STUDY" STUDIES="10" SUBGROUPS="NO" SUBGROUP_TEST="YES" TAU2="0.0" TOTALS="YES" TOTAL_1="0" TOTAL_2="0" WEIGHT="100.00000000000001" Z="0.41716935650198855">
<NAME>S4. Fig Stroke</NAME>
<GROUP_LABEL_1>Experimental</GROUP_LABEL_1>
<GROUP_LABEL_2>Control</GROUP_LABEL_2>
<GRAPH_LABEL_1>Favours [experimental]</GRAPH_LABEL_1>
<GRAPH_LABEL_2>Favours [control]</GRAPH_LABEL_2>
<EFFECT_MEASURE>Odds Ratio</EFFECT_MEASURE>
<IV_DATA CI_END="1.2379245239070114" CI_START="0.5300222955451369" EFFECT_SIZE="0.810017035544818" ESTIMABLE="YES" ESTIMATE="-0.2107" LOG_CI_END="0.09269416661467966" LOG_CI_START="-0.27570586128870994" LOG_EFFECT_SIZE="-0.09150584733701515" MODIFIED="2017-02-17 09:09:08 +0800" MODIFIED_BY="[Empty name]" ORDER="66" SE="0.2164" STUDY_ID="STD-Christof-Prugger_x002c_2012" TOTAL_1="0" TOTAL_2="0" WEIGHT="8.89645000901752"/>
<IV_DATA CI_END="1.3406894914594742" CI_START="0.8700678973090166" EFFECT_SIZE="1.0800420763926004" ESTIMABLE="YES" ESTIMATE="0.077" LOG_CI_END="0.127328205323149" LOG_CI_START="-0.06044685511004822" LOG_EFFECT_SIZE="0.03344067510655043" MODIFIED="2017-02-17 09:09:09 +0800" MODIFIED_BY="[Empty name]" ORDER="67" SE="0.1103" STUDY_ID="STD-Ekim-Seven_x002c_2015" TOTAL_1="0" TOTAL_2="0" WEIGHT="34.24366428443988"/>
<IV_DATA CI_END="1.2180936329438554" CI_START="0.7100023204794754" EFFECT_SIZE="0.9299727447357862" ESTIMABLE="YES" ESTIMATE="-0.0726" LOG_CI_END="0.0856806731145096" LOG_CI_START="-0.14874023188686175" LOG_EFFECT_SIZE="-0.03152977938617608" MODIFIED="2017-02-17 09:09:10 +0800" MODIFIED_BY="[Empty name]" ORDER="68" SE="0.1377" STUDY_ID="STD-Hamidreza-Saber_x002c_2015" TOTAL_1="0" TOTAL_2="0" WEIGHT="21.97168555590264"/>
<IV_DATA CI_END="3.2073435594379087" CI_START="1.209923285329828" EFFECT_SIZE="1.9699339218909298" ESTIMABLE="YES" ESTIMATE="0.678" LOG_CI_END="0.5061454825279394" LOG_CI_START="0.08275783493287009" LOG_EFFECT_SIZE="0.2944516587304048" MODIFIED="2017-02-17 09:09:11 +0800" MODIFIED_BY="[Empty name]" ORDER="69" SE="0.2487" STUDY_ID="STD-Jiankang-Liu_x002c_2010_x002c_F" TOTAL_1="0" TOTAL_2="0" WEIGHT="6.735652681669347"/>
<IV_DATA CI_END="5.666693981849978" CI_START="0.5099687265149062" EFFECT_SIZE="1.699951973872708" ESTIMABLE="YES" ESTIMATE="0.5306" LOG_CI_END="0.7533297600947514" LOG_CI_START="-0.2924564558990206" LOG_EFFECT_SIZE="0.2304366520978654" MODIFIED="2017-02-17 09:09:12 +0800" MODIFIED_BY="[Empty name]" ORDER="70" SE="0.6143" STUDY_ID="STD-Jiankang-Liu_x002c_2010_x002c_M" TOTAL_1="0" TOTAL_2="0" WEIGHT="1.1040029272873058"/>
<IV_DATA CI_END="3.1378408608856176" CI_START="0.49000732477115877" EFFECT_SIZE="1.2399858893552747" ESTIMABLE="YES" ESTIMATE="0.2151" LOG_CI_END="0.4966309140782667" LOG_CI_START="-0.3097974279634878" LOG_EFFECT_SIZE="0.09341674305738948" MODIFIED="2017-02-17 09:09:17 +0800" MODIFIED_BY="[Empty name]" ORDER="73" SE="0.4737" STUDY_ID="STD-S.-S_x00f6_derberg_x002c_2004_x002c_F" TOTAL_1="0" TOTAL_2="0" WEIGHT="1.8566262485668747"/>
<IV_DATA CI_END="5.603463414850433" CI_START="1.0800584137652631" EFFECT_SIZE="2.460095080974523" ESTIMABLE="YES" ESTIMATE="0.9002" LOG_CI_END="0.7484565407595467" LOG_CI_START="0.03344724445906776" LOG_EFFECT_SIZE="0.3909518926093073" MODIFIED="2016-07-30 19:05:18 +0800" MODIFIED_BY="[Empty name]" ORDER="74" SE="0.42" STUDY_ID="STD-S.-S_x00f6_derberg_x002c_2004_x002c_M" TOTAL_1="0" TOTAL_2="0" WEIGHT="2.3617432064301656"/>
<IV_DATA CI_END="1.4513248434333825" CI_START="0.43004009760289186" EFFECT_SIZE="0.7900176436786672" ESTIMABLE="YES" ESTIMATE="-0.2357" LOG_CI_END="0.16176462947497333" LOG_CI_START="-0.3664910482441663" LOG_EFFECT_SIZE="-0.10236320938459645" MODIFIED="2016-07-30 19:05:18 +0800" MODIFIED_BY="[Empty name]" ORDER="75" SE="0.3103" STUDY_ID="STD-Seth-S.-Martin_x002c_2015_x002c_F" TOTAL_1="0" TOTAL_2="0" WEIGHT="4.326808800879556"/>
<IV_DATA CI_END="1.1394515459042744" CI_START="0.4300099003212555" EFFECT_SIZE="0.699982460976843" ESTIMABLE="YES" ESTIMATE="-0.3567" LOG_CI_END="0.05669586194832325" LOG_CI_START="-0.3665215453381031" LOG_EFFECT_SIZE="-0.15491284169488992" MODIFIED="2016-07-30 19:05:18 +0800" MODIFIED_BY="[Empty name]" ORDER="76" SE="0.2486" STUDY_ID="STD-Seth-S.-Martin_x002c_2015_x002c_M" TOTAL_1="0" TOTAL_2="0" WEIGHT="6.7410726393512626"/>
<IV_DATA CI_END="1.3592936935849247" CI_START="0.6500115013330636" EFFECT_SIZE="0.9399768797793391" ESTIMABLE="YES" ESTIMATE="-0.0619" LOG_CI_END="0.1333133020032246" LOG_CI_START="-0.18707895886284714" LOG_EFFECT_SIZE="-0.026882828429811306" MODIFIED="2017-02-17 09:09:25 +0800" MODIFIED_BY="[Empty name]" ORDER="77" SE="0.1882" STUDY_ID="STD-Swapnil-N.Rajpathak_x002c_2011" TOTAL_1="0" TOTAL_2="0" WEIGHT="11.76229364645546"/>
</IV_OUTCOME>
</COMPARISON>
</ANALYSES_AND_DATA>
<FIGURES MODIFIED="2017-02-17 08:54:38 +0800" MODIFIED_BY="[Empty name]">
<FIGURE FILENAME="Forest plot.png" FILE_TYPE="PNG" ID="FIG-01" MODIFIED="2017-02-17 08:54:38 +0800" MODIFIED_BY="[Empty name]" NO="1" REF_ID="CMP-002.01" SETTINGS="SHOW_WEIGHT_COLUMN:YES;SHOW_ROB_TABLE:NO;SHOW_MORE_DECIMALS:NO;SHOW_EFFECT_SIZE_COLUMN:YES;SHOW_RAW_DATA_COLUMNS:YES;" SHORT_VERSION_FIGURE="YES" TYPE="FOREST_PLOT">
<CAPTION>
<P>Forest plot of comparison: 2 &#31532;&#19968;&#27493;&#26657;&#27491;&#24180;&#40836;&#12289;&#22320;&#22495;, outcome: 2.1 S1. Fig CHD.</P>
</CAPTION>
<FILE>iVBORw0KGgoAAAANSUhEUgAAAy4AAAEQCAMAAABhgtBtAAADAFBMVEUAAADAAAAAwAAAAMDg4ADA
AMAAwMD/gADAwMD/gICA/4CAgP/g4OBAAAAAQAAAAECAgID///8AAAALCwsWFhYhISEsLCw3NzdC
QkJNTU1YWFhjY2Nubm55eXmEhISPj4+ampqlpaWwsLC7u7vGxsbR0dHc3Nzn5+cAAAAAADMAAGYA
AJkAAMwAAP8AMwAAMzMAM2YAM5kAM8wAM/8AZgAAZjMAZmYAZpkAZswAZv8AmQAAmTMAmWYAmZkA
mcwAmf8AzAAAzDMAzGYAzJkAzMwAzP8A/wAA/zMA/2YA/5kA/8wA//8zAAAzADMzAGYzAJkzAMwz
AP8zMwAzMzMzM2YzM5kzM8wzM/8zZgAzZjMzZmYzZpkzZswzZv8zmQAzmTMzmWYzmZkzmcwzmf8z
zAAzzDMzzGYzzJkzzMwzzP8z/wAz/zMz/2Yz/5kz/8wz//9mAABmADNmAGZmAJlmAMxmAP9mMwBm
MzNmM2ZmM5lmM8xmM/9mZgBmZjNmZmZmZplmZsxmZv9mmQBmmTNmmWZmmZlmmcxmmf9mzABmzDNm
zGZmzJlmzMxmzP9m/wBm/zNm/2Zm/5lm/8xm//+ZAACZADOZAGaZAJmZAMyZAP+ZMwCZMzOZM2aZ
M5mZM8yZM/+ZZgCZZjOZZmaZZpmZZsyZZv+ZmQCZmTOZmWaZmZmZmcyZmf+ZzACZzDOZzGaZzJmZ
zMyZzP+Z/wCZ/zOZ/2aZ/5mZ/8yZ///MAADMADPMAGbMAJnMAMzMAP/MMwDMMzPMM2bMM5nMM8zM
M//MZgDMZjPMZmbMZpnMZszMZv/MmQDMmTPMmWbMmZnMmczMmf/MzADMzDPMzGbMzJnMzMzMzP/M
/wDM/zPM/2bM/5nM/8zM////AAD/ADP/AGb/AJn/AMz/AP//MwD/MzP/M2b/M5n/M8z/M///ZgD/
ZjP/Zmb/Zpn/Zsz/Zv//mQD/mTP/mWb/mZn/mcz/mf//zAD/zDP/zGb/zJn/zMz/zP///wD//zP/
/2b//5n//8z///9BjlLGAAArVElEQVR42u19e2wkx3nnx8f0cB5LsoakJMqRTtKu7TsL0sGbFfdB
rnWe3UjYyIFsR3GAOLB090csJ/AZh/jks3GAcsjBiS8RckbufLAuwFoX2IAfMmLBMmxrlz6H5ErL
rGifcIdADrlcvZZrk5wid0kOZ4bLuernVHdXd1fP9Mz0kN9vH9OPquqvHl/VV9X166+LAAKBkEM3
FgECgeqCQKC6IBCoLggEqgsCsZfQk8IyiB1Gqj09fQNb2nH+7kXuB4xrd7/ToxR7jNOpb1Xs92OM
4a6u3uRWj1/WrvYkjbyzkoB4ZQ1Hl/ih8hHYuHbzxpJPkMny+vF+8+Tpo+zCZGd0BDd2r12FzIhf
1kr9xzbNk/uOxStrqC7xA5kvJHLZ8XfDbKpvUFWfM31fVTvmVFJJV8xAKbgJs2lFOVNUWJ8M+TxA
f1Lpj3nWiuNfyQ2tThTNPFVSZ9QcDqeVZC1rKyxrIxlF6Ttby5qS7Ed1QQhHFygC/ALKkD/+/V12
3ltK/wH7uXF8Y/PYgBloCnrgwR+VN0sfLbMOWL0ycCSVPTIY76yV4VGmMyyHRp6+cvwVNYcbx64d
OGbpwzAkYCNZfuPEk2bWBo9kUkcGUF0QAlQhB+xvF2tVh6+w8yTMU+1G/0+/Yxj1+fzTr/yUtbuB
fjhnRjsBl+dVRYszuvSs7UIfzP8DO38KFtQc7sK7bn6naGbt/otpKPb0H2QFYeBjsHCZ5Q/VBSFq
UwVgfx+Hccix1gUT+k965vgXR402NfmfpuAQnHt6JwsnzWjn9WCxxuN61rrVrI2xcyOH2Znj7x81
hJ98cXr3dRi8bzfNMm7ga2qw8zGQH1fG4oe+X3s8Af/8tR+W74FXP/ctWHznTu1nezn5N8d/dZMF
uBsWz/6P9adK37zzlU+zG+xUvZS445tf+tZbN2Odtdffde9Z+J+3XSsbebp6J5MZFovLX/jNxOii
nrXEgbGnSrt3vsxlrffOV3/73Ns7OLog3EjP5CqFT838E7Oz5u5m5yU4dJeqRY/9+zfBXDyGT75c
ZHPj0kF2OKN22QAKPHwIYt77/dPMbxQqxRnKjDEtTwl4WM1h5rGeP2PZMLB2YXupGw7MscNpPWsp
OPgQs0lxdEG4sZWrJP6yN/OnQP/dN5RRWNxZ2f7vr8HihS9u/cW1zJbeBbMmdmy1sPxfu2+HxYH5
v9phl5ae2i4vr8c7a8+Qm19Kdh/Yho2V7b7bYHH6T8vfm4LFrcKW8s6NHjNr2aP/oW8hMbQEi3/z
lS9X2KWrn9va+dX1ONjJuIEfgUBjDIFAdUEgUF0QCFQXBALVBYFAdUEgEJLqMltNJpLZCoykbSHU
DaEeKGSTSjIzKxGyaXA9M69emcooSqpiC2ELyAIpSmbYPB1O8ffzMvmo9CvJZHZEDWwPnx+BgpJP
FmAp3+eS0TgaTtklTudVWSv5lCVAUkkPy+SWq4tMUumvsEQ0eYgyCJCd0m9NpVm9FlpcPWauRvJp
YZnL5Wo2qyifLZi5GkwQgIyRq2JGSWZnW5wrTl0+eOpK5dzYH2kcAzn87Vh/ee3oB2LWA0zC0und
a5vwRxW/QOXzRy1Wxf3HeVaFFL1i8MhA6cDYhhp80k7IuAnvmYDx98C91nZHF2FDfR6PBKitaAgU
SwSe8yFZF0fXskeGYAdmVXm2Nj8GlZv6drKl012/XBt7V8vrQWE5UrckKHyZb4VL44Gx9czcXWau
Pra1Bau7Rq4Gv3gtM/av2je6VOBfwMnJZy2OAftXSSfPAvSxbmJE7/p03kE+n9F6zqdYnNTkthma
NaK+1CzMpk8N5tUk0qxf6T+lDIAZIJ/PKWcqkedB53kwWb9qdDXPjP84l/jxPDHkN3kjU2fYmGON
hSdZw66klWRqysrxZ5VTsqwK1o/DyqRo/+8qlGGa3V0FUmC5/6zWrVdSWpmwPvFMn05Q4fESa1Tq
5vaXapdUzkdF43yw6GdTSS0v2itlNU21NElaGRxMavnT6yI1z5K4FXrVs2riORgydo28e/xHudRk
67cq/xgeUBs8LNcunWQNXyvzIstAMXUqZ/JerHYyeEYZGDyVNKVNQmqhlqvnElX4MyNXz4z/51xh
cqt96tIDh9NFtdZq/evQsfRnVJlVDmgSON5B8qoe+XBqik9t9/vHWcM79qq+33x1HQaOzGV/neNg
rGZLQ1FnweB5MFn/2Ljy16xrZ38rhvwmb+Sh0rU3jj9oWWCsCgaS5Y3jpy3CyFzm87Ksil6W9WHh
nTRr6CXWLH4Tlu868vns3D3qRXJ8Ti+TWy+dIGXnCDZ28cQwDJ+4OFa7pHI+BjTOBzv5zPXxopqX
m1puP5+ZU0t0d2Hi8O6V8SeNCFV1d1UVdqGYyFTgiQoUSpf1O2V4X1tG+bGLVZar6sUEnytW5n3l
/uNqrdyarW6ZvBernVRfmPj16mvjn7Hn6iYUFTZNgMoThb++bNbx6+2du/z0Ahx7JFPg725rdITv
s+ova/pt8Q7mtd3W1y/A8adrcxeAK4e1bveyvne0mGBhF2wcDDrP0owYBs+DyfqmVcgaq6JqyG/y
Rm7C7e/jWBWz67DV299vy+1hrZ+XwDrL+v2Zim6T82PFheOzlemdmUqhNJMow2Ej9xVY0MvkynKN
xVHD91gXvA0JzppXOR9b3VWd83ElwdTAyEsJDi+wegBYHGW9z6iVmgLfO8RCVS/0P3uUwLczqbtT
9yia7k9Am/b1K0zmZXuu1DLv6d+A59jpuWVWIwbvxWoniyz44rJ2X1f11CGWxeqFjewYgVT623f3
3Z3Uut/xtuSKU5exq1+4AEdtNq7OtDg5fbOyM7MCHO9AFzVxdY7F4OxHdvdxtbHqRZQzOBgftAXo
ijoLFs+Do3torIoukylisioOnXj/7cYeuckXp2/eAHLfzcvsrjl5U4N9Qu6hias/Y1kfcM9dvgT5
ib9I9E7cCf+FtYbHHtPbM18m4+7UDk/3FSrTl2szK43zQe4/oHM+cmpNGHn5hPrzNaMKEmBxQujs
J0vT3bC5vfwo/B7Q8uXSwvYbWtd0CArtUZeFqUqh7xCXq5/bynxMNc4M3ovVTnL2Mipc/EzpUBds
bSdUS3OtslBa2d7QcjXdllzxC8m501fnYBd0YUDtOWegoI4dT04MTnxavdylnnNRcmtXf5fZHTN6
aJa7AiywQLOFWvLs+CdqcrNmgCZkQXtely6rin+r7mNPsfHQkL9Lf27hz39+/oRp7abSxwlswlvc
tvCfqMHeknxqjrLCEjAw/oRV65+wdnwUnoYPwHcmJ8t6wc365Tz35PgXxxNcd8mku4tJ9+YvapeM
vCyoQgqW/xMb5c0uY3v/gjpgFYdOjGqq+nU40B51ySXHyfg3uFwV9FzxZT6tV43RTlwY2nx282tG
rtR+9lAxMZ7QKD1Pwnvbqy59+WJuic1gprWOeXhYm2kdOq2uurDKf1SrRTvvoC+fy72PtcouWNLt
+Lvn4JzKYbirNh4/dJDF6oaR09o5ORQ9bcHgeSTh4APGledmSKWSm06b8hu8kfRjPTu1wW3tQnLk
FLz3HrAII31wcA4uyD00lZ/K9XKGBjcDnIBfwT+y8eQf4R9gbiSf0de+amViPY9f14I5dQWpZtZx
nA9r1qvlhaV5EPrc67Cp5FJufBVSyshBUM2bT7FebESr3fmZwUIun26LNXZKLSI+VyUm03sPco1O
570Y7USQq5HiRB+klRG94RR34MKSlqtvTP/HNuSKU5e/nx1MDM6+DV+dvgPOzWx8X52ZX9zs0UZV
uKAt311+dbN4qUapuHFxUzk9+7+BzvwbveF0f+hlCpOvFLvV8UQz1S8VN19dg3Tyhq4luY2Lq1Fn
4cqlrQ32jNWLRWJQjJYP9GYysLlsyk9f/pCaz/XZ9ezLN2otfmLrlQvX1dF0jeVYtZsvbT7yqiRh
5PrsqeSN82vuucvKNLycgNELMJWEK+cfWb+4ptkhrxS/a5aJ9TzebpmB6QVNkax2NPHu9Ezmh9wq
iZ4XlqZaojy0dDNdd23+LAXZxNrWJTbHmepJQGpdK/TRc9Vbt86/3QZ1mZ/WczVdK/PxrdSF6xzj
c/WVjd5aO+GhrSFlu9cHf16AdGJ98zzLVZHlKnmXplYr65+/bZO1vdZChu9SOHDgxGsr0kkmU5cP
PHxR9NogD038ZBR7bPV3XtmK4BlNENO7TGwY3qhjIaSuSK3EyEeeDR9p6Z44fqVDZuJ9y+jS7kqI
6uu6fam6LLrzL6/9snk5GeqB0avLcFsVGnzIrdXR/xO5cN091d3l4Ia1W8fYO7Icb22BYZBtPb/9
fK2tvL0aR3VBNiUiNsjH/VucuMUSgUB1QSBQXRAIVBcEohPQi0WAiB+0VzAx/Dy6fXShzkPKXaOi
+FTwnzOiIBal7h+/CFHCfFwtk0JpBOFtISi1fj0Lxh5XDy2bUep8fi0lwV27FK561OqDohpGOrpQ
Qgl3ope15EqzLW5gWO2f/adl2mI8rtakhdIIwttDEKMROsODO2kNZhKSBUWdz68VD3HftUsh1BYg
HaAu5v6I7/InkzFVF+/mZVS22Ua4H0FY7roV1haDeOhbi/Pu+UQSQvOIXNKU1CsbEaToSp60tyQj
w6TnSdzVhajdoNVJ1noxQX/mGpSIq+8T9dv1tdHoQLz6dSKvLdJJU67h1yMbkS8r4tKcDlag+KqL
amF41SUB36GhFtejWol8U2sDqF0yf+EIdfXmEkkbFhxV/9KQfYOc9baX9mcMdoC6SM4eqH9gKncS
H+hNWH6UCxglxUkTLvVAhYx0nrbXNCk+6iI13w5YAqCuiajYSIiTvjTUFn3zQqKYozUwuFCrDlBl
okC3o8C5urQZZsJhgtqDEtuCk3AsojHUlgYHPb+80Cge0oC2EKKt4Bk/iGZM9d0lT3hj2zAwCBV3
yzbTphaWWDFUU0Sf+BoXvFJqnu0FNnPKLoZLmlp4YQgKPuK74loTGHlV8XlALV0jkGsFHBEtWr+B
H2uxeQXoX7bxL3ncwI+Ii/WIa8lNMcbiObFGSBQgwYLH0QWBQHVBIFBdEAicuyAQLUBciS4CdaGO
CaF9C4VjGdKxq1IA92X7XmZa20bQjlkot+eRF8QtjzOgS3Bh/o09/3xcMPd2h3vx6NwBTnUp7TJ5
vHLh41Kc7Ec7uhDwqUqntoRfxRcSSwi0Z4nTRWOxK7JPQKfgfuyw6PguXFLELZPH5jxb3FjvStZl
e17/7h0VNrlYGmOE56zwPBcXl0XcX1v1x/WuVLBZ2XcYaledhdyR6B0wQr5L+OAurkwHQJc0P7kW
b7F7/Xpe+1AQtBdXcNeuO3tTW4QNO3q+S4jgaHO1Z6pPPItfRI0h5uik/xFW4F7YARNuj1sUfBf/
p9JAnW7xrrxGMNiJ6hLMZaGh623PwMGLJ/5tPCq+i8cg7SDrhIqLiEhdgqf7AmqMxOcpKNl7Mxdf
LkkkfJdGrDbUkkjR7VW+3Nd53KsuTmoMf5N4c5j3Yt35ckki4btI2XqoLa0fXUySpGnrGsQMi5/h
xVLXX0EI7AJim+C2lebiMRfgqSiSAUMIHgXfRfRUL+GdL1/sJY5oGC3ju2A/14KSRL5Lq40xRPz1
paXREIFT/WYYP1jWzS9J5Lvg6IJAoLogEKguCATOXRCIlkHbZxnL/TAuvgvw+yntkHJf4WBnWBuT
4zPT5F5C2EgpFiNFgu8CxNcTgeAm74sg5If2HNQZexJ2mZxxke/SxNHFf18r9aXDcIEEPltiVFFe
/l28dpS6uSUgYL/4F4PdF0E4voubOiPw72KXugP5LjbRu+R755jMXaju/4uKvE5pnqqMTTKGTywr
kJByGdP3Y9S+BU5WVurvTIK/QgKCyY8tASJ4fL6SxK6zCgJRUTvskLlLre1Q+7dEHQQWBzPGqx3F
cxMG520rwM2TpzVXiy3Rb9bHdyG+d0Uyoc3VGnWx6Oc8Yda2UYk/I1Rcp1TY2cZ4B4ah6wT4H/+m
XJuSeW7Hp8SpJE3iu/iWsM3vG6IpcxcfH3TOXfpS9nDMq4qEM1wsl2mODsQjMHUlHyXfJaiEiTmz
6aQ9e53xJRh3HYvtY+JvFuyXfoyEnOFYN3DzVseizteUlHP/QgObSUe0Dyorq1RAzlprofB15wnR
yNxFyO8yTQ/einbRLYQMi1jxLaLy7+LLfrEXQ0N8F58ydMnkXCCLB7VoDyFSvgtyWlq0MlFfBSDf
pV3GGKL9ZmOLoiGCpvrNmfwiml7KyHfB0QWBQHVBIFBdEAhUFwQC4Zzqi/ZnSK1OUhFFxEV64T9L
1rYsu32jGNwEjy2WIn5MIN/FVS71812cjBabfxexVxqn852O4buoxLDBzlGXutux62t9LtKLnbDR
Pgj4K1QgtCC8nb3jy3dxvU+vn+/iZrTwDxV6paGOZGLLd3FK9HyX4GKctLxX3JxMtyy2b1Dy16jj
xT911iF/a4+s+BsZoRLeIayg9fLjQjiIcY3vrrixHVWcguW/C/Fe8Jbx72IfKoj5t94yiasaSGdE
YkuJ3/bmOv27UP/kxGwK3M/ZAnVxbj02aCD2uvCvCH8HSHHUIfn9Vc6vE0tuLjE8rdTJd2mMM9Qp
fJfBTlQX5yZjoZ0Z4Rjc7sEFgucibunrc5pSN9+FNJC1TuO7xBfdIh2hdpa0NkmkoZjTHVU5lDbU
F4QYXJpQNP6fGGgwawhvdfFds/Aac8QhOkpbfD20BBdNSG2p35yqP2uoMU0wxmrGuMtTC6EO7y3c
mbXkb1wLIL20XZO8fKME812EAanMtzBILVjE/l18dNKfK4OoBw3wXbzG/zpJuYjGjT/ku7Rlqi9l
GmC7j5++RG7OIaJQl3o5F6hkEViTdRYulnzzpvoIBALVBYFAdUEgUF0QiBhP9VvDdyHByTYRAf5d
XJLZ+DFcCKlPkPOsFf01jeS7J5FXmZp/Fzdnh09TfBe/kxy5ukBL+C60nW+aA/27UM/wthBSe8yo
o4Sk+S4izzA1upCbs0P94hqvkmlTu6BG0AVQVX+frzsF0i512T98F7tgYR27kFBPaNZYSgRZcXmV
aX4NNJi7NSOFznxN2Wy+i+bsov06RITmj49kwSG8n0ABSPM0x2d4Ix3wxiXu+/b91aXZfJd4IoRj
F74pSu7Hsrap1cF38S9p8PGWQHHnfvPVpdl8l7ZZX34tO7jvd4YgcvwYVw8Urg279ru6Ug4WGRG9
utjdIVJHhYSbnsezS5N0ihe4S7Sh/IU2Q0k9z8CW3RS0h+9CYlifpi9ab/aLPQStJ/X65QpzF7Wl
BaPLvuO72C94TULC8mPEzTesfxcvrzL+MpnvkahhEiDRJWIg36XzZmDId4nZVF/KQsB2Hz99aY49
iGhQXZDvEssFC+S7tGmqj0AgUF0QiBDIorogELJ4K4vqgkBI68uXfab6AWQXk7QR/F0tr/Q8Ijg9
LxDeC0zU/mAcnlPM5IP9u+jZDwrv9ywJvos/0UXk9oU4Hydm9CDfpS584o4NT3WRaGeURF7sdkqH
8cO5LIn4M6mOxxoPkvDvArxLlXB8F2n/Lv5EF1GCfO/klJi/0Hkf429cYJNI09D4wrW/Xs/6Mnok
SgT9LU+J0f5498nUzpLhhw/r7TYJHKUi1U23zxVOHWRGCn6LNgn7rAAQ34v+CRp3ieD5HTmyNC7z
WqOJUPhn10FidDF7JFf/SexKFdAn2wYNJ8syYGduc95Ce293D7RWqJidHLK+Q2eL8o7DQj2OCJLY
V2icSDN4HWTURVT8xP0ynwT0ya4+mIiTb48/GOqw+wO+IkCEXyGmsjudJf27ULAbV569isMFoI9K
Iu2lbm3pAil1Ee7OI56VRGWadb07/ppW08TD6VYoMYisPzDThAtovOZdcxtrUJFKzElQVRqY/Hio
CyW+XakjhGg2Q4KGCc9pMSWtssWkumK58LROF0U0ml5C9F2EVhfdfkO314qERJ0G819kVzraU700
pCxCxy60kWf5BqQy2oJ8l5bCzXcxhndifcfBxoPhD4nIJvCjgQjvufgxIgpHU4YUMR/HaVJ6cktE
pJ7gZwXxXfyJLl5lZp9SWXyXBo1ghMs2a3sxIj8mgpKipPGSjgFiz3fBTTCdpC9tjI1wGGNtAvJj
Iigp0nhBI3B0QSBQXRAIVBcEAtUFgdibU/148l0i9gfjFM9yvRLEd7GL4uUPxjduHf5dXO5xHElQ
p9T8tmTkuzRTXSTaWRv4LtH6g3G/N/egl9iE4yI49tDTwIzVgtXh38VNYrGXBnU+yFZyXFzSmSvJ
YaXuCs9wIQ2oy/7huxhHlIQrPs9ojdSDd0wRZyVw35nldypqJmrrEVb4tWZmtyP4LpH6g3FvQXao
OvVRX+qOJilZ3Z6RRJwVIkpXUHL70fpqqq+YjuC7NL//sk8F5ISRm4Q4XI7J+3ehECFnBectTVaX
OPFdWjray27MCreLn+/v5Ro+kXLuJ/l4pIdFri77lu8SZtbpForK7X2ktWU12myZUDWahc7guzTV
H4y8k02b65dgfzC26RcJt6BI65IposUlhMTosu/4LkKpXIJ7+aWRIro4mSd1+HfxeRwlfkIi3yV6
IN+l44D+XWJmjCHirS8tjYYQG2NtAvJdoisw9O+CowsCgeqCQKC6IBCoLggEwjbVl+SVcLtgAnZa
iWgs0PZ3AF4OVOzeW6TCB+ZHEDcs38XhTkZPwulzxuuVCy9jDPeNrTV5R2RT1SXUwjwN3PEiprFQ
0uYXAN4OVHjvLcHhZfIjihuW72J3J6NfcfmccYgsrIH28V08H9zluPc8f0Liri6E8l2hWdaOvpSI
ukFq1GiNBQPxX7m075YOpoASn5/ApzSq4QFDPa8LLicwJB4FLRxdbPdi/5qy179rE5FW7OVg48Xw
LJiOQ2jvLXKJkhCNP7S2mFKTiBW0RRjstDZiVxfCf9WdiM0Gbm+YZ0X5d9Qxer3Me2ghIeZtvGMX
6r/Fkp9HhOG7SJZboKtLApH3ATjVt+sLdVcSFY2wLhK9hKsRKYckzZ7kO7NS1wcIiDnloUHsOLuz
lrqIXh7lhloQE2MM/O1fm7EmjOjRp7WXNhls5tBg75T1dNXyPHuPh9ZXbji4RIpusallWA5EMMBQ
fyMhSFvitNHPNpTSkG2PhspPw9mmdaWL2tLk0cXgutQWV5xsEOfcxbiiWRhcRC8aS9u5FzVqiB/N
xie8XDRHXGn/Lq6Y9gue6brVwiUxomE0je+CHRq0vmSR79JiYwzRAfrS0miIoKl+U6bViOaXLPJd
cHRBIFBdEAhUFwQC1QWBQDg28IM3hcV2T8SMcW3tcPBBnE5R2jb7FPhcsRNdqJd/l3r4O9TOS5Hm
uzj2mvnxXVxSiO929HeSY8KMcdHDqM+3eO173N0Lk071sW1SdoZpV925/bU4iC7UK3w9/B1qLxxp
vgsvBXGITXw4Oz4Sx9i/iynZ854huqT2I7Z2dLH1TpT78HFQV63tg9L9vHg4bQnhFKUd+uM8kqgN
UudDZMPX6d8COnHF2JTY+zXlWjyy1SuQvEZhcVhY3JHhccXtqsVju62HL5V2K4rNcUATPvnNtfpw
3+wnYuNx3yImzBheXTzct3jd4+8L/beIGobNh1xMWkEIPpvdWwcNsQfO2uIVmu8i2hxmqzMR/Vj4
JWtEpKMLAW8/kB7zGhq6ZcbHZKBiqzEwDzbmSSBX392vhOO7EN/nUF4NfedpiGZM9T1ass8KQN1u
KOIww6REMHIENH8inz8qcpLTjCk36ayS71R0By/MeHSxJChk3Nkupm8UKrrok6MQc/BaYrQRnQ4b
CLWllXOXmmsX9z2nizHOCHB4MbHTQuymdls9Ucp4ThGGt+dImD9PNQvLd3HF9Oe72DJV8yoTF47R
nkGT+C7otKXpU67w5Yp8l6YZY4hYT7laGA3hYYw1beYZ9jaizsJDvguOLggEqgsCgeqCQKC6IBAI
+0JyS/ku0X++WxIuNkhNNCF/hTre4xvEGPuP7LPq47vY5LLxXVzeX8BRrNzO19hP9tcg7l8Zbx/f
xXf/TDO1xckGMb/O6cFfocSxs1LIEJN8Vh18F7dcxNf7i10e20dJY9XyBNJ0gfd+xfipi71P3Ed8
Fxo2oP1bqrKZIo0I5f9uktSVobaCiEeXeI+A3YJcUKJ9vRVcHDzbZhZjvCHGJ1+tzVFi1p5lWVDq
SCKO9RYQsC5toaH4XiSEYvnExW8kN290aS3fJYYwTRYScZq1qV1j/l06fItLIAY7y3tYS/kusTMO
9N2ikVJEuB2oxFaMLWrbOLg0e6rv0aj3JN+lTlUOYYuRBqZKcsVJfSnN1KoiVJmmzF0kR40I+C4k
XjVIY55mPaaYwbfx4/AgGp277Be+i1A019ylEZHr9+9SK0c7vcZDphrFZU9NZmIH5Lt0HJDvEj9j
DBFjfYmPtbmfjbHWTZtxcGlO2SLfBUcXBALVBYFAdUEgUF0QCASqCwKB6oJAoLogEKguCASqCwKB
6oJAoLogEAhUFwQC1QWBQHVBIFBdEAhZZKoFVBcEQgazqbfXPh5TfenF6kHECoXRawDfmKwkcHRB
IILGlluvqT/XDo7EUboupKQiYoP85DBdYb9DqwDDG6lYjy55DebZcIq7of2cTUGlqiSrs1DQQw4q
AwDZnBk+maxW1LBn9rsGZlh5qSWVLcBsNqn0VzQbgx2x8rGVWUAaOtLq0dk+pW/EqCT1J6vfrvQr
SnYWRlJJJVtxRR7JKMn0CIykFfUuV7fxxdnCCgwBrLJ/K1kSa3WZnNT/6bj/uNOmfDIBvafOv3jq
NPxfmJ1kIbff2IbKjj4pq3y0Z+ncqQH18EKxsJ+VZSR9VO0fT2XSY9+E02MvZo4MqZe/OZbOnhqy
lZk3Kpmj5lH6GPs/97f0jeqmUU0AS5kx/XjoSPYHYw/Ajd0rm2OWY5QRM3Lx4/0bxz4Cv3vzjQF2
d7IDyu7vP8yGFfZX+7dyub8T5i79SrIfFNaRwSzrl84Ujcv3jPdCEk4ehjL8FjyjXrk5WoUhYxD6
ynwqd3JySzM7Txzcz+pyX1X9vwwLC/AC++lfYP8xvAAL8+xIK7MvB6Xx8K519KD6f2k6NVrasm5/
3Lxdhvl+SMF2afQGWKPLfebdjWdXduAt+G+l0deh0hFlV7Wf/kEHqMvgkUzqyEBZ7cYe/FF5s/RR
s5+DeegC1i/uwg58OpkuQM9Id6W8oN99Cl43E+iF0r6eq17XKz6Xg/OsrMZyeiM4r16o6mX2O3Jp
aEcvqP/vQEbJ1Fr8xXes5pUbA007DtZq0roL0PfIyy/od3s6ouwevGtItcWMf3f/ZQeoSxEWLhsN
vggD/XDOUpcc04RDKdXH08x0+tgd0LeevCV5T0IzMcfBssdvwM39rC4bCb08NExYfaZ2tGsrs6A0
uNQmkutHa3E2zbLWnqL63BrehJTrLsDVnx1XY01tQF9nFN764LA6b9Hssb9bgw5QF1C7QX08P/f0
ThZOmmto7N9bFzeHZh6HzdLYAuvx1sqLxcWPbWlGwgxY9rgZe19jRv3vCZg2Sw4O6aXNl1kYzBd1
m07wFKaNwx+d+ILoI5W5Bfg9Npk5dXKuUz5hWXh7ZFU7+NC7/zV0hroUZo3Lj8Bbr3N2ZQFym6Wt
6tdrIQ8quflEVbfA3mNFhw+gujCztcDmDT0wW9DV5S31gnp0sGiWmTw0rTspfIpaV7M3nnvxtEfU
/wWF6ydfXOuYghst3qr+3PJXK9AR6tIHBx9ic/oZbXZYqs3aFTjALOgKmVAglVxKacN76XWYqTyh
3k1PLxeK+ax6eAAuorok4dAc/AAS8NAhVnL5PCvPuYPqAgqUrsHM7BMyadRWflNwMOUqVXY7CQcf
Zj3VA11XUrbw+klKqaiPJPBaqoNKLrE5CkOf++UYdIa6LL66Wby0DmtTg7A2c1dtGtILt8JKb6bI
xvXr3XcNXlpkNgCMQir9bfXucn9qdPCSNuS/AglUl8XzNx6ZpXBuduvGJc26uPLoI5vnV40yG/92
SJP+1a2BRwUrwSuHNzdnJyF14uPaW5Vp+91sIrN16Tp72n0d8c7F0pftX0v+eS6essm/1S/cnlyX
CthfvppDfWkS8j7vT0Y+8my9UeOSu7hLGGITTJFsS4VLpQrYrJsFpata9rqXSfnZ+wpAGdWlQYTY
kZzallSrIrbqpsGvxW9u1hsTUffcBYFAoLogEKguiAZBmxCyzmjPx0YSiuqCQODogkC0CvzKGCW1
/+1HsiOY07O7/kNcwxxxjXzEdmT3bW9eJMZDBCmYsjsTcuaBah7qicfTjbTdTk/FAnJpi4XSQ1hR
CHpI30vq0jCI+9zdPojLMKSEV1VD5+xayyVDBCkY566ERCaoUyIuefWH+AaxCUj4cKKHUXsUSuKj
LTSekxcaS0lIgLronadWxUajtw7VXtJoiPoNbjhQz6gV3tU7mw0n0GU1cY12hPIdtCsFY1SwZ43Y
rlvRo+rhiUP7/LIVvzGFePcfvtZDXW00+ge0S5Jer7B650mJs8vX9cZxw+p+idlAiUcHrqlOrd+X
dgRPOFvPnQIBV5vVjpxS0JriCZ7uUnEfAfXkKQGfbJllQV2qhdgLxhiV6x75LtvdAIjb5iCCExJe
u0lgCrXJk3Ma5ZCc+FomJFBAd/JBQqnDMJUYWREdoy7mdJlrP1TOCqRNsTQbMDHkW6XejkNGlAlF
iUuRxEqM6PCpvkSzIyGaD/WcnBPZwUXQymhIvfCKS4KD1JcwdYhtn0nFcRoTWchmP6BdkvQGW0Pu
piu29UnNGvMcX6ic5LYlJ0r8bbN6FkYkZrqk0QrBdeN9MroQ600Hqb1xMA4N24XYXo1wZ9yarNPe
cZg9zti6gW+sXnHvNeyPCrCr7AnZNMLj8bWgnuu8rnSJbalPSigzepwUyPbGSTIkDdOR2KJJxJPt
Xmh9vZmcEK53eBzq+ugrJZFkOqrCi64WSPh0O3gA4d84BY/29hdaoR8gNduTVIJ6y10uDrXevbnD
h94EQxlaoy1tsOJpe9Q5ForT1EkDJVFK0Uwh/EOFfqtPmpWZOCREwie7J1Sm+ZmQMZ9IHITwD4H+
XRCtsJGjNlvbJATuSEbsieGrNUKguiBa0K/vFSFQXRAtaKh0jwjBLSQL2SmSK43u7Dj3KzpfOfBb
LsGHAeNeBa+blIIQlhglIPnexdheK98UuNdTId54yLV7Um9+JaWQeO8i2mpC6lBnF0+MCDkkns91
vRGwr+DTEKQU1BdEc40xSqn1Q40tl9S8TE0qln4XHHeMuPa02B3+ppku9dRSEoWRimqCiBq94rHI
wRh0UF/s3b2AFONIi9hYMdpfniriZ5UR//FahjWDwwuiieoS0EHbN4MRGy1YtkcnIg0gPmpBXOx9
mZeEyC5BNF9dqKiFSi45UL/VCFr3/M7F15fUShxZEM2euxAG/Udy6c2IoDVrQjxuOU9EU6bazEd2
jYSPg+gkFDox/V7P3lyqwRLqoqFT39HDvdBGiWDIoHVZdeFHLYQNmheYyRDBA8L6fVH/di6UPaFo
pLjdIUkk/jp6RSrAczpqHFovhgvYSTG2IckWiWPMgPW1GCpaRafOdyYNklIQkpiMNrjf/RPczcl8
9FKccFyejMIjVLegszZMJtMkM28Y5zXDyorB3SHEmPETPhjhUwAzXTOu20YzLhGXTH5jSk0KWwYQ
oTGSUpJn4UwFKn0wm1HSs3qPz/7lB85AUUmmpsyglazqwTwzDGczkD+rpCvMCkonM8wSyg/2aTEG
k8rZYp9y1gyrpqEU2a288RwvDPclk0ST4gxU0qpneksKlvSUovQNW1Kc0dLPONJXwxnyN3HuEm/s
W1JK63AjU157En5wC9yqwAPJch/XL/d8HfqzpR9bjmOHaDk5BGsbhT/8CcCnr70wBHDneumHaqF3
XdVC7C6d/8PRq+c/qYVVhtRLXz/fz4aESeM5Xth4qbS2CTO3wC0zQJKlvjtrt5auwqls+aUNq038
8cCnWPqJ8vd6+fTVcA7595261ENKQcjOAzQnltsrkBqHkQqUktA3D/OVWoD5HCTLU/eWzPNSAgol
SBTvUMZY15Q7zG7sJOCk6jt2QXe5uJo7efxy7uSEFpaqERdzJ3UvzvpzPKU4CakJeLEMFQV2FmxS
FHOQKE3da/nnKh9eZsely3C4j09fDeeQf/+pC6KJc5dJ1eJfHciw9v6LHdhdhvEc5HZrAZgK0Gp+
1DKDxlnTrjLzbWeRnSTU23CCXdrVg4J20Tw0woLluVR/jpcUlcEvs7v37sDOCpxgUlRtUrwJp0aX
zPMJLUlVVODTV48c8qO6IKLG78NKlrW1HtLDTKoCFPRGYq7MJjZ/mbbMoGnWtMuse+++h53MamFm
9EtuTDtv6M/xQv9u/3UmRWKQGVgzTAp9xDDnIUOb11K/b6VcMP4vVJ2p1ORHdUE0BedfKqpGk/L+
ZYCL/w8OsgFiplgwzdq+Yu4Fy398XwXOpWG28s42a7GnYY4ZQ4kKnBUOGiwsSdeUp2I+xwM3Vx9V
ZzqJw0yKRAoOXWRxcgVz1tQ3lVuyFhyUuQp7cOkQzJX49FUY8qO6IJqF9Q/crraLX00XmdHzULL0
JsDawG1Dxt0DOaX2PmV1MPFMBj6Yzb10B0CP8mFmk00OKJ/6qShZFvZYxjpLZM3neCntgVFNihkm
xeSQUmTPzG6O9hh3s7+RHDhvBk09k32JTZpKiQ/v8OmrMOSPCF04FUbUvTAw6XfaQEpNiRuFF3JU
F0TdSFZtUxGlbl/kSiNuzCUjK1G4Skd1QSBw7oJAoLogEKguCASqCwKB6oJAoLogEAhf/H8jSrpl
A1YkNgAAAABJRU5ErkJggg==
</FILE>
</FIGURE>
</FIGURES>
<FEEDBACK/>
<APPENDICES/>
<EXTENSIONS/>
</COCHRANE_REVIEW>
